# Supplementary material
Source: publisher figshare collection journal article supplement (https://diabetesjournals.figshare.com/articles/dataset/_/17430542)
Supplement: Supplementary file 1 [file 32118626]

## SUPPLEMENTARY DATA

### Contents

|                                                                                                               |    |
|---------------------------------------------------------------------------------------------------------------|----|
| Supplementary Figure 1—Summary of study design and analytical strategy. ....                                  | 2  |
| Supplementary Figure 2. Flow of participants in current UK biobank study .....                                | 3  |
| Supplementary Figure 3. Associations between plasma polyunsaturated fatty acids and type 2 diabetes risk..... | 4  |
| Supplementary Table 1. Characteristics of 424 T2D-associated SNPs in UK biobank .....                         | 5  |
| Supplementary Table 2. Cluster weight for T2D Loci.....                                                       | 14 |
| Supplementary Table 3. Single-nucleotide polymorphisms associated with circulating individual FAs ..          | 17 |
| Supplementary Table 4. Components and scaling methods of diet quality score used in the UK Biobank study..... | 18 |
| Supplementary Table 5. Definitions of prevalent diabetes and incident T2D .....                               | 20 |
| Supplementary Table 6. The percentages of participants with missing covariates .....                          | 21 |
| Supplementary Table 7. Spearman correlations between plasma fatty acids (% of total fatty acids) .....        | 22 |
| Supplementary Table 8. Associations between plasma PUFAs and type 2 diabetes risk.....                        | 23 |
| Supplementary Table 9. Interactions between plasma PUFAs and GRS/cluster GRSs for T2D .....                   | 25 |
| Supplementary Table 10. Interactions between plasma FAs and number of FA-associated alleles for T2D .....     | 27 |
| Supplementary Table 11. Interactions between plasma FAs and individual FA-associated SNPs for T2D .....       | 28 |
| Supplementary Table 12. Multivariable hazard ratio (95% CIs) of T2D from subgroup analyses.....               | 30 |
| Supplementary Table 13. Multivariable hazard ratio (95% CIs) of T2D from sensitivity analyses .....           | 36 |

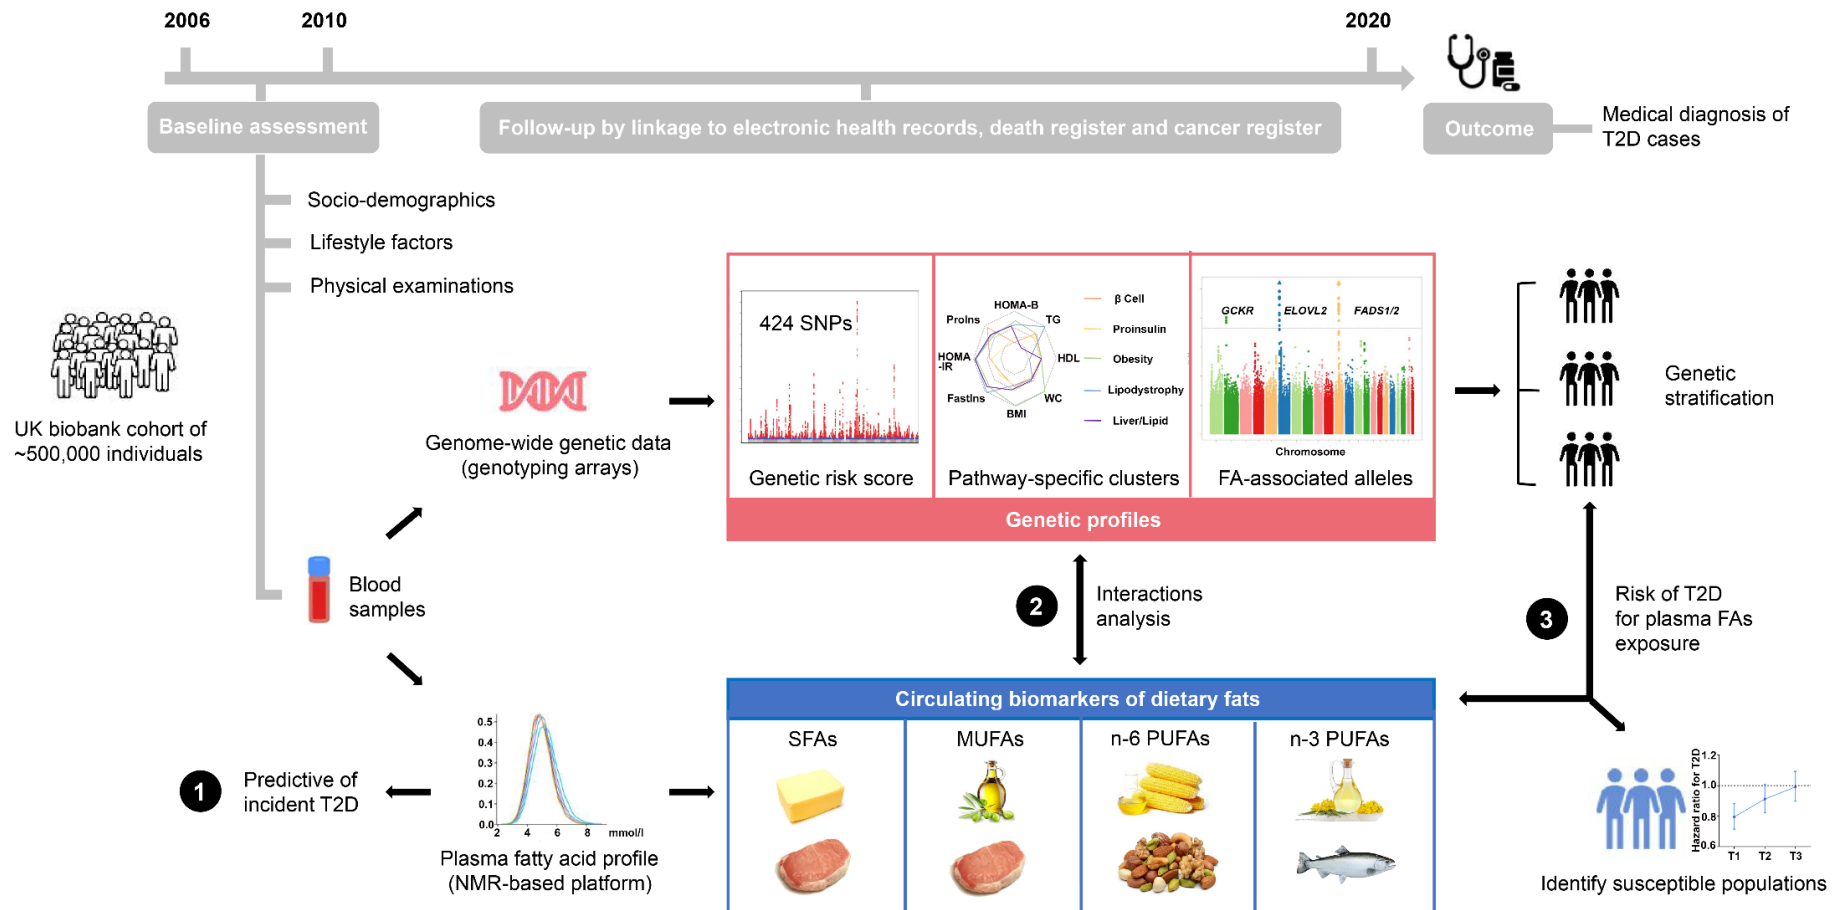

**Supplementary Figure 1—Summary of study design and analytical strategy.**

Participants from the UK Biobank were enrolled between 2006 and 2010 and were prospectively followed up to the end of 2020. A wealth of phenotypic data was collected at baseline. Genome-wide genetic data were obtained by genotyping arrays and plasma FA profile was analyzed by a high-throughput NMR-based platform. We first assessed the relations of specific plasma FAs with future T2D risk ( $n=95,854$ ). Second, we evaluated the interactions between specific plasma FAs and the genetic predisposition to T2D, captured by the GRS and pathway-specific GRSs ( $n=89,955$ ). Third, risk of T2D in subgroups stratified by GRSs or FA-associated variants was also explored. FA, fatty acid; GRS, genetic risk score; MUFAs, monounsaturated fatty acids; PUFAs, polyunsaturated fatty acids; SFAs, saturated fatty acids; T2D, type 2 diabetes.

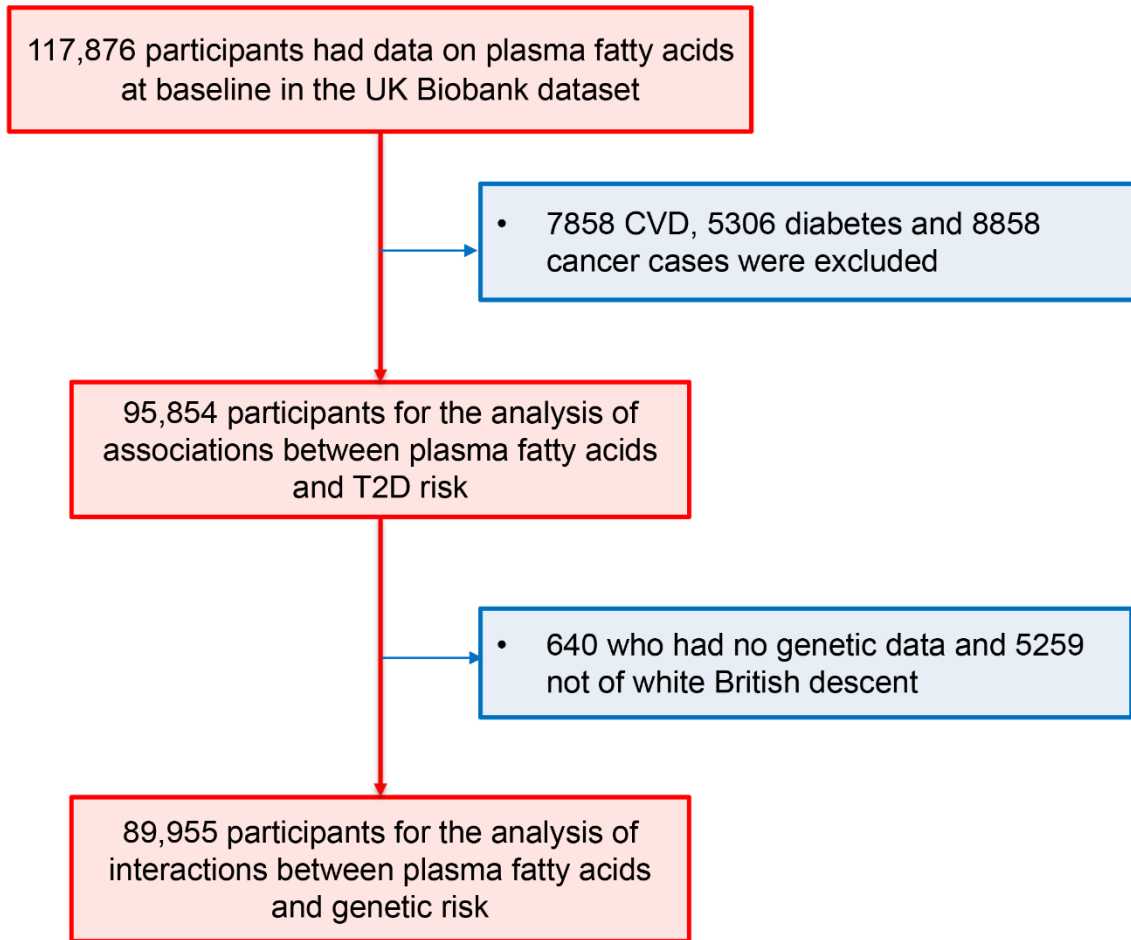

**Supplementary Figure 2.** Flow of participants in current UK biobank study

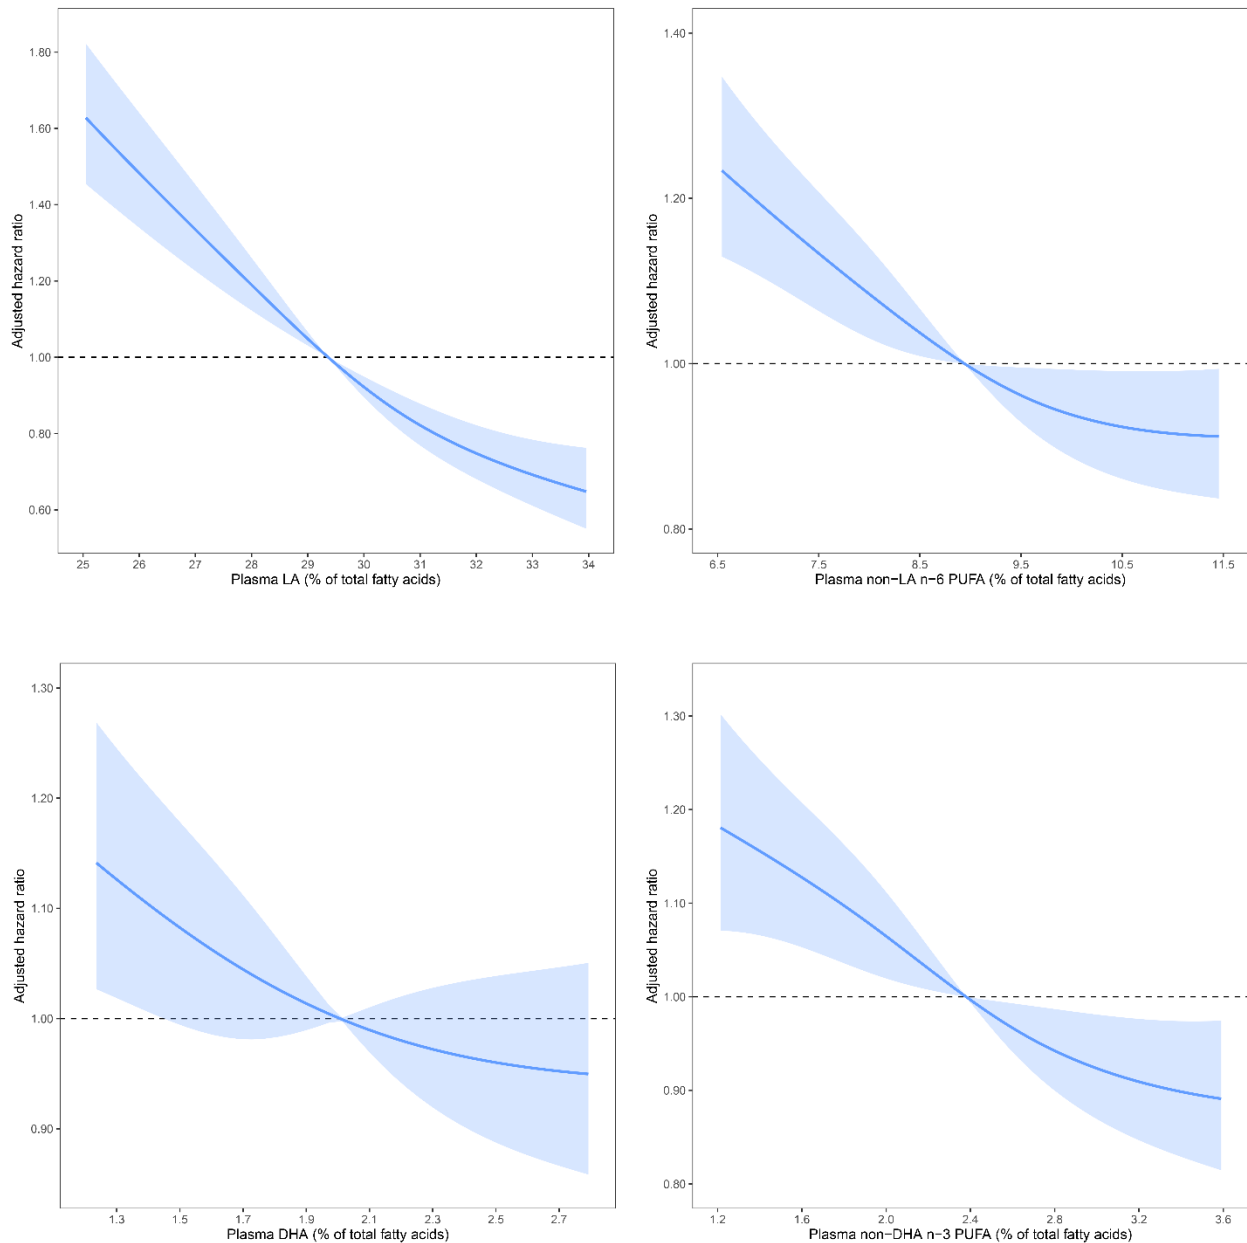

**Supplementary Figure 3.** Associations between plasma polyunsaturated fatty acids and type 2 diabetes risk.

Hazard ratio were estimated by restricted-cubic-spline regression adjusted for age, sex, race, centers, BMI, education, Townsend deprivation index, household income, smoking, alcohol consumption, physical activity, history of hypertension, history of high cholesterol, family history of diabetes, vitamin supplement use, mineral supplement use, aspirin use, and remaining plasma fatty acids (SFAs, MUFAs, LA, non-LA n-6 PUFAs, DHA, and non-DHA n-3 PUFAs). Shaded areas represent 95% confidence intervals. MUFA, monounsaturated fatty acid; PUFA, polyunsaturated fatty acid; SFA, saturated fatty acid.

**Supplementary Table 1.** Characteristics of 424 T2D-associated SNPs in UK biobank

| rsid        | Chr | leadSNP         | Effect allele | Other | EAF   | $\beta$ |
|-------------|-----|-----------------|---------------|-------|-------|---------|
| rs10097617  | 8   | chr8:95961626   | T             | C     | 0.469 | 0.037   |
| rs10137475  | 14  | chr14:58797953  | G             | A     | 0.422 | 0.026   |
| rs10145154  | 14  | chr14:79939525  | T             | C     | 0.222 | 0.055   |
| rs10188334  | 2   | chr2:653874     | C             | T     | 0.828 | 0.050   |
| rs10240790  | 7   | chr7:89880949   | G             | A     | 0.714 | 0.028   |
| rs10305420  | 6   | chr6:39016636   | C             | T     | 0.608 | 0.032   |
| rs10404726  | 19  | chr19:18834514  | C             | T     | 0.533 | 0.028   |
| rs10406327  | 19  | chr19:33890838  | C             | G     | 0.521 | 0.037   |
| rs10407429  | 19  | chr19:46157237  | G             | A     | 0.574 | 0.054   |
| rs10471048  | 4   | chr4:83587562   | G             | C     | 0.337 | 0.034   |
| rs10490871  | 3   | chr3:35667761   | G             | A     | 0.365 | 0.027   |
| rs1059592   | 8   | chr8:22477778   | A             | G     | 0.354 | 0.027   |
| rs10737818  | 1   | chr1:235542023  | G             | A     | 0.643 | 0.040   |
| rs10750397  | 11  | chr11:128234144 | A             | G     | 0.278 | 0.048   |
| rs10769936  | 11  | chr11:8654528   | C             | T     | 0.725 | 0.035   |
| rs10771372  | 12  | chr12:27962260  | C             | T     | 0.803 | 0.072   |
| rs10771813  | 12  | chr12:31367856  | C             | A     | 0.554 | 0.026   |
| rs10787287  | 10  | chr10:112647195 | T             | C     | 0.767 | 0.036   |
| rs10788575  | 10  | chr10:89768584  | A             | G     | 0.164 | 0.035   |
| rs10811661  | 9   | chr9:22134094   | T             | C     | 0.826 | 0.138   |
| rs10821311  | 9   | chr9:96943059   | A             | G     | 0.318 | 0.036   |
| rs10830963  | 11  | chr11:92708710  | G             | C     | 0.274 | 0.089   |
| rs10841868  | 12  | chr12:21781246  | G             | T     | 0.740 | 0.032   |
| rs10844518  | 12  | chr12:33410780  | G             | A     | 0.279 | 0.033   |
| rs10882891  | 10  | chr10:99059645  | C             | A     | 0.403 | 0.031   |
| rs10889560  | 1   | chr1:65989878   | A             | C     | 0.082 | 0.047   |
| rs10899283  | 11  | chr11:76505202  | C             | T     | 0.778 | 0.031   |
| rs10915188  | 1   | chr1:29024956   | A             | G     | 0.583 | 0.029   |
| rs10916784  | 1   | chr1:20729451   | G             | C     | 0.581 | 0.027   |
| rs10937208  | 3   | chr3:184877626  | G             | A     | 0.136 | 0.044   |
| rs10937721  | 4   | chr4:6306763    | C             | G     | 0.591 | 0.084   |
| rs10938398  | 4   | chr4:45186139   | A             | G     | 0.434 | 0.043   |
| rs10963942  | 9   | chr9:19080352   | G             | A     | 0.390 | 0.037   |
| rs10974438  | 9   | chr9:4291928    | C             | A     | 0.351 | 0.047   |
| rs10998304  | 10  | chr10:70342775  | C             | T     | 0.451 | 0.031   |
| rs11038672  | 11  | chr11:45846498  | C             | G     | 0.475 | 0.029   |
| rs11048458  | 12  | chr12:26465585  | T             | C     | 0.243 | 0.046   |
| rs11073147  | 15  | chr15:36392562  | G             | A     | 0.551 | 0.025   |
| rs11078916  | 17  | chr17:37746307  | T             | C     | 0.276 | 0.037   |
| rs11108094  | 12  | chr12:95928113  | A             | C     | 0.069 | 0.060   |
| rs11117364  | 16  | chr16:88132199  | G             | A     | 0.676 | 0.029   |
| rs1111875   | 10  | chr10:94462882  | C             | T     | 0.591 | 0.092   |
| rs11129735  | 3   | chr3:36870230   | A             | G     | 0.455 | 0.026   |
| rs11155073  | 6   | chr6:139837128  | T             | C     | 0.409 | 0.030   |
| rs11181613  | 12  | chr12:43046449  | C             | A     | 0.849 | 0.043   |
| rs111824905 | 1   | chr1:28110797   | C             | T     | 0.052 | 0.069   |

|             |    |                 |   |   |       |       |
|-------------|----|-----------------|---|---|-------|-------|
| rs11201999  | 10 | chr10:88124501  | C | T | 0.541 | 0.026 |
| rs1122518   | 7  | chr7:13900325   | C | T | 0.476 | 0.026 |
| rs11257655  | 10 | chr10:12307894  | T | C | 0.207 | 0.091 |
| rs112667817 | 5  | chr5:137823156  | C | T | 0.883 | 0.061 |
| rs1127215   | 1  | chr1:117532790  | C | T | 0.580 | 0.043 |
| rs113036477 | 12 | chr12:97848227  | C | T | 0.943 | 0.072 |
| rs114136102 | 5  | chr5:36084426   | C | T | 0.040 | 0.072 |
| rs114447556 | 4  | chr4:53207093   | T | C | 0.082 | 0.058 |
| rs11558471  | 8  | chr8:118185733  | A | G | 0.682 | 0.103 |
| rs11602873  | 11 | chr11:72460762  | A | T | 0.843 | 0.098 |
| rs11614914  | 12 | chr12:133070294 | T | C | 0.327 | 0.039 |
| rs11616380  | 13 | chr13:80705315  | G | T | 0.712 | 0.079 |
| rs11639470  | 15 | chr15:39639171  | C | G | 0.535 | 0.027 |
| rs11646052  | 16 | chr16:85716463  | G | A | 0.394 | 0.026 |
| rs11655898  | 17 | chr17:62201374  | C | T | 0.070 | 0.059 |
| rs11657964  | 17 | chr17:36100767  | A | G | 0.397 | 0.059 |
| rs11662800  | 18 | chr18:13271367  | A | G | 0.415 | 0.028 |
| rs11666603  | 19 | chr19:12496934  | C | T | 0.764 | 0.033 |
| rs11667244  | 19 | chr19:47580185  | G | A | 0.715 | 0.035 |
| rs11680058  | 2  | chr2:16574669   | A | G | 0.870 | 0.056 |
| rs116861182 | 11 | chr11:55588216  | C | A | 0.057 | 0.064 |
| rs117001013 | 22 | chr22:32348841  | C | T | 0.914 | 0.047 |
| rs11708067  | 3  | chr3:123065778  | A | G | 0.757 | 0.078 |
| rs11716527  | 3  | chr3:89986280   | C | T | 0.105 | 0.049 |
| rs117173251 | 8  | chr8:4186731    | T | C | 0.033 | 0.077 |
| rs11723275  | 4  | chr4:77528821   | C | A | 0.464 | 0.027 |
| rs117233107 | 12 | chr12:4328521   | G | A | 0.985 | 0.325 |
| rs117316450 | 11 | chr11:14518419  | G | C | 0.021 | 0.131 |
| rs11759026  | 6  | chr6:126792095  | G | A | 0.228 | 0.065 |
| rs11793831  | 9  | chr9:23362311   | T | G | 0.415 | 0.027 |
| rs11830243  | 12 | chr12:132544694 | T | C | 0.108 | 0.044 |
| rs11870735  | 17 | chr17:481604    | T | C | 0.180 | 0.034 |
| rs11922794  | 3  | chr3:72813582   | C | G | 0.245 | 0.030 |
| rs11940813  | 4  | chr4:20210953   | G | A | 0.133 | 0.037 |
| rs1194606   | 1  | chr1:154294260  | C | T | 0.235 | 0.030 |
| rs11967262  | 6  | chr6:43760327   | G | C | 0.488 | 0.037 |
| rs12001437  | 9  | chr9:34074476   | C | T | 0.368 | 0.034 |
| rs12048743  | 1  | chr1:205114873  | G | C | 0.430 | 0.032 |
| rs12056338  | 8  | chr8:12643055   | T | G | 0.416 | 0.031 |
| rs12187734  | 5  | chr5:51763665   | C | T | 0.515 | 0.029 |
| rs12194820  | 6  | chr6:127401978  | A | T | 0.755 | 0.046 |
| rs1225052   | 3  | chr3:131644937  | G | A | 0.375 | 0.027 |
| rs12263348  | 10 | chr10:65305252  | T | C | 0.348 | 0.028 |
| rs12305809  | 12 | chr12:133777466 | G | A | 0.606 | 0.033 |
| rs12454712  | 18 | chr18:60845884  | T | C | 0.623 | 0.041 |
| rs12463719  | 2  | chr2:203450680  | A | G | 0.283 | 0.032 |
| rs12505942  | 4  | chr4:140906390  | T | C | 0.656 | 0.030 |
| rs12509379  | 4  | chr4:129179458  | T | G | 0.202 | 0.031 |

|             |    |                 |   |   |       |       |
|-------------|----|-----------------|---|---|-------|-------|
| rs12519500  | 5  | chr5:78436905   | C | A | 0.650 | 0.038 |
| rs12539264  | 7  | chr7:48839003   | G | A | 0.283 | 0.029 |
| rs12602834  | 17 | chr17:29637308  | G | A | 0.385 | 0.029 |
| rs1260326   | 2  | chr2:27730940   | C | T | 0.604 | 0.064 |
| rs12625671  | 20 | chr20:42994812  | C | T | 0.107 | 0.065 |
| rs12741141  | 1  | chr1:6669970    | G | C | 0.355 | 0.040 |
| rs12773019  | 10 | chr10:73835274  | G | C | 0.027 | 0.089 |
| rs12820906  | 12 | chr12:123493123 | A | G | 0.753 | 0.043 |
| rs12823740  | 12 | chr12:124458002 | C | A | 0.666 | 0.041 |
| rs12890750  | 14 | chr14:103860309 | G | T | 0.651 | 0.028 |
| rs12910361  | 15 | chr15:77782335  | G | A | 0.712 | 0.072 |
| rs12912777  | 15 | chr15:38852386  | T | C | 0.125 | 0.059 |
| rs12917449  | 15 | chr15:74331659  | C | A | 0.196 | 0.036 |
| rs12920022  | 16 | chr16:89564055  | A | T | 0.161 | 0.039 |
| rs12933120  | 16 | chr16:3634746   | A | C | 0.143 | 0.042 |
| rs12977104  | 19 | chr19:4949921   | A | G | 0.204 | 0.041 |
| rs12992995  | 2  | chr2:175197545  | C | A | 0.724 | 0.031 |
| rs13005841  | 2  | chr2:212302573  | A | T | 0.708 | 0.029 |
| rs13020443  | 2  | chr2:152167830  | C | T | 0.508 | 0.031 |
| rs13155752  | 5  | chr5:44680687   | C | A | 0.396 | 0.032 |
| rs13237518  | 7  | chr7:12269593   | A | C | 0.415 | 0.029 |
| rs13262861  | 8  | chr8:41508577   | C | A | 0.825 | 0.102 |
| rs133015    | 22 | chr22:38572526  | C | G | 0.560 | 0.029 |
| rs13389219  | 2  | chr2:165528876  | C | T | 0.606 | 0.065 |
| rs13414140  | 2  | chr2:43671176   | C | T | 0.885 | 0.118 |
| rs1412234   | 9  | chr9:28410683   | C | T | 0.327 | 0.044 |
| rs1421085   | 16 | chr16:53800954  | C | T | 0.403 | 0.118 |
| rs1430780   | 2  | chr2:67878328   | T | C | 0.320 | 0.027 |
| rs1431819   | 9  | chr9:116943357  | G | A | 0.696 | 0.029 |
| rs1437055   | 3  | chr3:86831077   | A | C | 0.617 | 0.027 |
| rs144245804 | 11 | chr11:69453044  | G | A | 0.974 | 0.130 |
| rs1449348   | 3  | chr3:168225055  | C | T | 0.860 | 0.045 |
| rs1451506   | 17 | chr17:57407019  | A | G | 0.115 | 0.042 |
| rs145904381 | 1  | chr1:151017991  | T | C | 0.988 | 0.174 |
| rs146886108 | 5  | chr5:14751305   | C | T | 0.993 | 0.390 |
| rs1475655   | 13 | chr13:91963080  | A | T | 0.739 | 0.044 |
| rs149364428 | 8  | chr8:97737741   | A | G | 0.008 | 0.224 |
| rs1493694   | 1  | chr1:120526982  | T | C | 0.107 | 0.071 |
| rs1513272   | 7  | chr7:28200097   | C | T | 0.498 | 0.081 |
| rs1517037   | 18 | chr18:56878274  | C | T | 0.812 | 0.038 |
| rs152839    | 5  | chr5:50145266   | C | T | 0.584 | 0.026 |
| rs1531583   | 4  | chr4:744972     | T | G | 0.039 | 0.099 |
| rs1561927   | 8  | chr8:129568078  | C | T | 0.268 | 0.035 |
| rs1562398   | 7  | chr7:130457931  | G | C | 0.415 | 0.041 |
| rs1573090   | 6  | chr6:137302159  | T | G | 0.538 | 0.045 |
| rs1656794   | 17 | chr17:75386909  | G | A | 0.725 | 0.031 |
| rs17035289  | 4  | chr4:106048291  | C | T | 0.160 | 0.043 |
| rs17036160  | 3  | chr3:12329783   | C | T | 0.882 | 0.103 |

|             |    |                 |   |   |       |       |
|-------------|----|-----------------|---|---|-------|-------|
| rs1705263   | 12 | chr12:71523043  | C | A | 0.560 | 0.040 |
| rs17091891  | 8  | chr8:19843171   | T | C | 0.880 | 0.042 |
| rs17175860  | 19 | chr19:7235146   | G | A | 0.194 | 0.045 |
| rs1724557   | 4  | chr4:137094048  | C | A | 0.413 | 0.025 |
| rs17265513  | 20 | chr20:39832628  | C | T | 0.199 | 0.033 |
| rs17294565  | 8  | chr8:14124809   | C | A | 0.384 | 0.027 |
| rs17354348  | 2  | chr2:213835977  | A | G | 0.743 | 0.029 |
| rs17439448  | 7  | chr7:40816653   | T | C | 0.122 | 0.040 |
| rs174541    | 11 | chr11:61565908  | T | C | 0.640 | 0.029 |
| rs1752169   | 9  | chr9:126586563  | A | C | 0.250 | 0.032 |
| rs17522122  | 14 | chr14:33302882  | T | G | 0.470 | 0.034 |
| rs17624303  | 2  | chr2:105148418  | C | T | 0.730 | 0.029 |
| rs17684074  | 18 | chr18:54675384  | G | C | 0.748 | 0.031 |
| rs177045    | 10 | chr10:71321279  | G | A | 0.315 | 0.039 |
| rs17772814  | 8  | chr8:128711742  | G | A | 0.918 | 0.075 |
| rs17791513  | 9  | chr9:81905590   | A | G | 0.938 | 0.069 |
| rs17818197  | 8  | chr8:25872634   | G | A | 0.224 | 0.035 |
| rs1783541   | 11 | chr11:65294799  | T | C | 0.217 | 0.048 |
| rs1815591   | 20 | chr20:61277014  | A | T | 0.389 | 0.034 |
| rs181752889 | 3  | chr3:128579324  | T | C | 0.002 | 0.282 |
| rs1819564   | 6  | chr6:51505337   | A | T | 0.028 | 0.076 |
| rs1872635   | 12 | chr12:54541750  | A | G | 0.688 | 0.028 |
| rs1874832   | 15 | chr15:67260238  | G | A | 0.154 | 0.038 |
| rs1929883   | 9  | chr9:81344701   | G | A | 0.584 | 0.039 |
| rs1968204   | 7  | chr7:102800137  | T | C | 0.093 | 0.057 |
| rs197379    | 1  | chr1:112292303  | C | T | 0.380 | 0.027 |
| rs197482    | 6  | chr6:143069315  | C | T | 0.623 | 0.030 |
| rs2008027   | 6  | chr6:126052359  | G | A | 0.516 | 0.027 |
| rs2011603   | 4  | chr4:18025484   | A | G | 0.737 | 0.038 |
| rs2032912   | 16 | chr16:69568303  | G | T | 0.590 | 0.042 |
| rs2033159   | 2  | chr2:145261174  | C | A | 0.229 | 0.035 |
| rs2055997   | 4  | chr4:76535086   | G | A | 0.708 | 0.031 |
| rs2056857   | 14 | chr14:77300863  | C | T | 0.582 | 0.026 |
| rs2080090   | 17 | chr17:65828371  | A | T | 0.189 | 0.053 |
| rs2103132   | 7  | chr7:69782073   | C | G | 0.247 | 0.032 |
| rs2115107   | 19 | chr19:7968168   | A | G | 0.382 | 0.038 |
| rs2191349   | 7  | chr7:15064309   | T | G | 0.548 | 0.066 |
| rs2237895   | 11 | chr11:2857194   | C | A | 0.415 | 0.073 |
| rs2243102   | 17 | chr17:4839149   | C | T | 0.406 | 0.026 |
| rs2250301   | 10 | chr10:104548393 | G | A | 0.751 | 0.032 |
| rs2252221   | 20 | chr20:51621922  | G | A | 0.526 | 0.025 |
| rs2268078   | 20 | chr20:32596704  | A | G | 0.641 | 0.039 |
| rs2269247   | 1  | chr1:64107284   | C | T | 0.818 | 0.035 |
| rs2280141   | 10 | chr10:124193181 | T | G | 0.528 | 0.045 |
| rs2289739   | 15 | chr15:41801512  | T | G | 0.345 | 0.050 |
| rs2290203   | 15 | chr15:91512067  | A | G | 0.198 | 0.056 |
| rs2292662   | 3  | chr3:63897215   | C | T | 0.849 | 0.056 |
| rs2297508   | 17 | chr17:17715317  | C | G | 0.351 | 0.033 |



|            |    |                 |   |   |       |       |
|------------|----|-----------------|---|---|-------|-------|
| rs2313211  | 3  | chr3:183738626  | T | A | 0.445 | 0.029 |
| rs2336938  | 1  | chr1:206618799  | A | C | 0.477 | 0.030 |
| rs2403221  | 11 | chr11:9852475   | A | G | 0.674 | 0.032 |
| rs2409742  | 8  | chr8:11069960   | C | T | 0.512 | 0.036 |
| rs2410767  | 5  | chr5:87705268   | C | G | 0.787 | 0.033 |
| rs2426439  | 20 | chr20:50999627  | C | T | 0.633 | 0.037 |
| rs243018   | 2  | chr2:60586707   | G | C | 0.451 | 0.056 |
| rs2435907  | 15 | chr15:57333416  | A | G | 0.582 | 0.029 |
| rs253412   | 5  | chr5:74955841   | A | G | 0.662 | 0.046 |
| rs2540949  | 2  | chr2:65284231   | A | T | 0.624 | 0.050 |
| rs256904   | 5  | chr5:55810305   | T | A | 0.746 | 0.069 |
| rs2581787  | 3  | chr3:53127677   | T | G | 0.560 | 0.025 |
| rs2583921  | 12 | chr12:66170481  | C | A | 0.089 | 0.095 |
| rs2613503  | 1  | chr1:72839774   | A | C | 0.803 | 0.039 |
| rs2658746  | 18 | chr18:74582340  | C | T | 0.378 | 0.030 |
| rs2675662  | 10 | chr10:75599127  | A | G | 0.563 | 0.027 |
| rs2725371  | 8  | chr8:30854033   | A | G | 0.303 | 0.037 |
| rs2732480  | 12 | chr12:48736303  | C | A | 0.572 | 0.034 |
| rs2733289  | 12 | chr12:41838235  | C | T | 0.478 | 0.030 |
| rs2737226  | 8  | chr8:116639474  | T | C | 0.392 | 0.038 |
| rs2796441  | 9  | chr9:84308948   | G | A | 0.581 | 0.059 |
| rs2820444  | 1  | chr1:219741820  | G | A | 0.702 | 0.047 |
| rs28429551 | 9  | chr9:139243334  | A | T | 0.755 | 0.073 |
| rs2862954  | 10 | chr10:101912064 | T | C | 0.502 | 0.029 |
| rs2876826  | 7  | chr7:50581972   | G | A | 0.223 | 0.031 |
| rs28819812 | 4  | chr4:157652753  | C | A | 0.678 | 0.038 |
| rs2908286  | 7  | chr7:44234737   | T | C | 0.178 | 0.068 |
| rs2925979  | 16 | chr16:81534790  | T | C | 0.299 | 0.045 |
| rs2933211  | 14 | chr14:47313541  | A | G | 0.493 | 0.027 |
| rs2972145  | 2  | chr2:227101309  | C | T | 0.646 | 0.090 |
| rs3020781  | 1  | chr1:155269776  | G | A | 0.265 | 0.033 |
| rs303760   | 18 | chr18:21083738  | T | C | 0.345 | 0.034 |
| rs3094682  | 6  | chr6:31264461   | C | A | 0.815 | 0.060 |
| rs3111316  | 19 | chr19:13038415  | A | G | 0.587 | 0.044 |
| rs314879   | 13 | chr13:23309382  | C | T | 0.212 | 0.039 |
| rs3176466  | 1  | chr1:51438365   | C | T | 0.910 | 0.064 |
| rs329122   | 5  | chr5:133864599  | A | G | 0.421 | 0.026 |
| rs340874   | 1  | chr1:214159256  | C | T | 0.568 | 0.067 |
| rs34143602 | 15 | chr15:63940058  | G | A | 0.410 | 0.035 |
| rs34298980 | 6  | chr6:40409243   | T | C | 0.491 | 0.038 |
| rs34329895 | 2  | chr2:208870017  | A | G | 0.396 | 0.028 |
| rs34340810 | 8  | chr8:105661926  | G | C | 0.927 | 0.054 |
| rs34506349 | 2  | chr2:100598726  | G | A | 0.959 | 0.068 |
| rs34573045 | 3  | chr3:149196752  | G | C | 0.433 | 0.031 |
| rs34584161 | 13 | chr13:26776999  | A | G | 0.764 | 0.052 |
| rs34589210 | 2  | chr2:112795492  | A | G | 0.145 | 0.039 |
| rs346240   | 18 | chr18:40063830  | G | A | 0.204 | 0.031 |
| rs348330   | 1  | chr1:229672955  | G | A | 0.367 | 0.053 |

|            |    |                 |   |   |       |       |
|------------|----|-----------------|---|---|-------|-------|
| rs34845373 | 2  | chr2:25635771   | A | G | 0.727 | 0.037 |
| rs34965774 | 12 | chr12:118412373 | A | G | 0.130 | 0.052 |
| rs34990153 | 8  | chr8:9996389    | A | G | 0.556 | 0.038 |
| rs35004890 | 19 | chr19:1224286   | T | G | 0.231 | 0.036 |
| rs35169799 | 11 | chr11:64031241  | T | C | 0.063 | 0.050 |
| rs35352848 | 3  | chr3:23455582   | T | C | 0.796 | 0.062 |
| rs35895680 | 17 | chr17:47060322  | C | A | 0.673 | 0.056 |
| rs35901985 | 4  | chr4:186580062  | A | G | 0.821 | 0.035 |
| rs36051838 | 10 | chr10:34018730  | C | T | 0.086 | 0.044 |
| rs36111056 | 15 | chr15:83461873  | G | A | 0.789 | 0.034 |
| rs362307   | 4  | chr4:3241845    | T | C | 0.074 | 0.050 |
| rs3742305  | 13 | chr13:31036642  | C | G | 0.732 | 0.030 |
| rs3747207  | 22 | chr22:44324855  | A | G | 0.215 | 0.047 |
| rs3755879  | 4  | chr4:96114385   | A | G | 0.301 | 0.033 |
| rs3757969  | 8  | chr8:145551199  | G | C | 0.374 | 0.048 |
| rs3764002  | 12 | chr12:108618630 | C | T | 0.738 | 0.040 |
| rs3798519  | 6  | chr6:50788778   | C | A | 0.179 | 0.050 |
| rs38221    | 7  | chr7:15926228   | T | C | 0.253 | 0.033 |
| rs3872707  | 3  | chr3:9514016    | A | G | 0.124 | 0.045 |
| rs3887925  | 3  | chr3:186665645  | T | C | 0.549 | 0.042 |
| rs39328    | 7  | chr7:103444978  | T | C | 0.424 | 0.028 |
| rs41276588 | 1  | chr1:118148384  | A | G | 0.285 | 0.038 |
| rs4132228  | 3  | chr3:64708114   | C | T | 0.711 | 0.047 |
| rs419842   | 20 | chr20:42310811  | T | A | 0.842 | 0.041 |
| rs429358   | 19 | chr19:45411941  | T | C | 0.846 | 0.073 |
| rs4325     | 17 | chr17:61563200  | C | A | 0.532 | 0.035 |
| rs4397977  | 13 | chr13:41688401  | A | G | 0.342 | 0.029 |
| rs4465929  | 3  | chr3:15741389   | T | C | 0.402 | 0.030 |
| rs448918   | 9  | chr9:136885979  | A | G | 0.265 | 0.033 |
| rs4655617  | 1  | chr1:67010654   | C | A | 0.440 | 0.028 |
| rs4688760  | 3  | chr3:49980596   | T | C | 0.689 | 0.034 |
| rs4709746  | 6  | chr6:164133001  | C | T | 0.865 | 0.058 |
| rs4714422  | 6  | chr6:41012405   | G | A | 0.245 | 0.029 |
| rs4721089  | 7  | chr7:1872921    | T | C | 0.782 | 0.034 |
| rs4734193  | 8  | chr8:110140564  | C | A | 0.527 | 0.034 |
| rs4776970  | 15 | chr15:68080886  | A | T | 0.642 | 0.029 |
| rs4796224  | 17 | chr17:34842521  | G | A | 0.472 | 0.025 |
| rs4805681  | 19 | chr19:31835516  | C | T | 0.605 | 0.027 |
| rs480840   | 11 | chr11:74625997  | C | T | 0.429 | 0.025 |
| rs4809369  | 20 | chr20:62470785  | G | A | 0.548 | 0.034 |
| rs4845987  | 1  | chr1:11306279   | C | G | 0.709 | 0.028 |
| rs484943   | 15 | chr15:40398754  | T | C | 0.338 | 0.033 |
| rs4865796  | 5  | chr5:53272664   | A | G | 0.692 | 0.047 |
| rs4899280  | 14 | chr14:69526307  | T | C | 0.332 | 0.028 |
| rs4916253  | 1  | chr1:172361032  | G | T | 0.433 | 0.027 |
| rs4929965  | 11 | chr11:2197286   | A | G | 0.379 | 0.062 |
| rs495203   | 9  | chr9:136145240  | T | C | 0.318 | 0.049 |
| rs4976033  | 5  | chr5:67714246   | G | A | 0.401 | 0.028 |

|            |    |                 |   |   |       |       |
|------------|----|-----------------|---|---|-------|-------|
| rs4984980  | 16 | chr16:968292    | A | G | 0.182 | 0.035 |
| rs5219     | 11 | chr11:17409572  | T | C | 0.357 | 0.069 |
| rs534043   | 7  | chr7:100312724  | G | A | 0.887 | 0.045 |
| rs543159   | 6  | chr6:160776017  | C | A | 0.527 | 0.032 |
| rs545608   | 1  | chr1:177899121  | C | G | 0.206 | 0.036 |
| rs555784   | 9  | chr9:85318704   | T | A | 0.617 | 0.030 |
| rs55812705 | 6  | chr6:111738793  | T | C | 0.755 | 0.031 |
| rs55857387 | 16 | chr16:300388    | T | C | 0.801 | 0.052 |
| rs56337234 | 4  | chr4:1784403    | C | T | 0.506 | 0.041 |
| rs56348580 | 12 | chr12:121432117 | G | C | 0.692 | 0.058 |
| rs56394279 | 3  | chr3:160171092  | C | T | 0.471 | 0.031 |
| rs567185   | 1  | chr1:201763499  | T | C | 0.649 | 0.037 |
| rs5751061  | 22 | chr22:41593873  | G | T | 0.629 | 0.026 |
| rs5753043  | 22 | chr22:30588041  | C | A | 0.908 | 0.061 |
| rs576674   | 13 | chr13:33554302  | G | A | 0.167 | 0.061 |
| rs5771069  | 22 | chr22:50435480  | G | A | 0.497 | 0.033 |
| rs583769   | 7  | chr7:18331915   | A | G | 0.246 | 0.031 |
| rs58542926 | 19 | chr19:19379549  | T | C | 0.074 | 0.089 |
| rs60519666 | 6  | chr6:107427166  | G | A | 0.676 | 0.035 |
| rs6066138  | 20 | chr20:45594711  | G | A | 0.718 | 0.045 |
| rs61736066 | 17 | chr17:70645032  | G | A | 0.913 | 0.051 |
| rs61779275 | 1  | chr1:39820310   | T | C | 0.212 | 0.075 |
| rs62034975 | 16 | chr16:20392415  | C | G | 0.302 | 0.031 |
| rs62075585 | 17 | chr17:76762039  | G | A | 0.473 | 0.030 |
| rs62262091 | 3  | chr3:47693664   | T | C | 0.094 | 0.056 |
| rs62271373 | 3  | chr3:150066540  | A | T | 0.060 | 0.069 |
| rs62310934 | 4  | chr4:48880627   | C | G | 0.618 | 0.030 |
| rs62450857 | 7  | chr7:4683258    | A | G | 0.134 | 0.039 |
| rs62492368 | 7  | chr7:150537635  | A | G | 0.304 | 0.034 |
| rs62515938 | 8  | chr8:57483013   | T | C | 0.261 | 0.029 |
| rs62618693 | 11 | chr11:32956492  | C | T | 0.955 | 0.085 |
| rs6432613  | 2  | chr2:161145612  | G | A | 0.724 | 0.039 |
| rs6438247  | 3  | chr3:115084080  | C | T | 0.131 | 0.044 |
| rs6459733  | 7  | chr7:156930550  | G | C | 0.662 | 0.051 |
| rs6495182  | 15 | chr15:75814388  | C | T | 0.749 | 0.041 |
| rs663640   | 18 | chr18:57846077  | T | C | 0.219 | 0.050 |
| rs6685701  | 1  | chr1:26868639   | A | G | 0.271 | 0.030 |
| rs67013744 | 12 | chr12:6681786   | G | A | 0.166 | 0.035 |
| rs6715901  | 2  | chr2:179650954  | G | A | 0.503 | 0.027 |
| rs6741676  | 2  | chr2:181618654  | A | G | 0.662 | 0.032 |
| rs6766859  | 3  | chr3:138055136  | C | T | 0.372 | 0.033 |
| rs67755137 | 7  | chr7:74108135   | A | G | 0.193 | 0.033 |
| rs6777684  | 3  | chr3:187741842  | G | A | 0.610 | 0.057 |
| rs6819331  | 4  | chr4:153504295  | C | T | 0.681 | 0.040 |
| rs6821438  | 4  | chr4:95091911   | A | G | 0.530 | 0.029 |
| rs684214   | 17 | chr17:40696915  | T | C | 0.280 | 0.042 |
| rs686998   | 3  | chr3:173119768  | G | A | 0.530 | 0.027 |
| rs6878122  | 5  | chr5:76427311   | G | A | 0.319 | 0.055 |

|            |    |                 |   |   |       |       |
|------------|----|-----------------|---|---|-------|-------|
| rs6976111  | 7  | chr7:117495667  | A | C | 0.302 | 0.032 |
| rs7026688  | 9  | chr9:125975397  | G | A | 0.863 | 0.044 |
| rs703981   | 10 | chr10:80942855  | G | C | 0.543 | 0.061 |
| rs7046845  | 9  | chr9:97804641   | A | C | 0.911 | 0.047 |
| rs7071943  | 10 | chr10:93956552  | G | T | 0.659 | 0.044 |
| rs7099048  | 10 | chr10:77647107  | A | G | 0.515 | 0.028 |
| rs7132908  | 12 | chr12:50263148  | A | G | 0.384 | 0.033 |
| rs7163757  | 15 | chr15:62391608  | C | T | 0.571 | 0.041 |
| rs7188071  | 16 | chr16:28917644  | T | C | 0.353 | 0.029 |
| rs7219033  | 17 | chr17:9787958   | A | G | 0.329 | 0.029 |
| rs7220340  | 17 | chr17:27566326  | A | G | 0.460 | 0.027 |
| rs7240767  | 18 | chr18:7070642   | C | T | 0.387 | 0.037 |
| rs72501964 | 4  | chr4:1267203    | G | T | 0.963 | 0.083 |
| rs72692805 | 1  | chr1:149894355  | G | A | 0.921 | 0.054 |
| rs72695645 | 4  | chr4:185713608  | G | A | 0.859 | 0.061 |
| rs727734   | 6  | chr6:15475051   | A | T | 0.761 | 0.030 |
| rs72802342 | 16 | chr16:75234872  | C | A | 0.923 | 0.115 |
| rs72803684 | 2  | chr2:26192802   | T | C | 0.047 | 0.069 |
| rs72836348 | 2  | chr2:111888043  | G | A | 0.898 | 0.056 |
| rs72926932 | 18 | chr18:53050646  | C | A | 0.080 | 0.075 |
| rs72951506 | 6  | chr6:118011723  | C | T | 0.844 | 0.042 |
| rs73347525 | 14 | chr14:101255172 | A | G | 0.818 | 0.049 |
| rs73872717 | 3  | chr3:141134569  | C | T | 0.954 | 0.086 |
| rs74672008 | 3  | chr3:152451616  | G | A | 0.964 | 0.080 |
| rs74804697 | 15 | chr15:52588722  | C | G | 0.955 | 0.084 |
| rs75332279 | 15 | chr15:53099306  | C | T | 0.100 | 0.056 |
| rs7538321  | 1  | chr1:205789455  | T | A | 0.127 | 0.042 |
| rs75401573 | 22 | chr22:29805444  | C | T | 0.922 | 0.051 |
| rs75432112 | 5  | chr5:102586407  | A | G | 0.050 | 0.134 |
| rs7558413  | 2  | chr2:18721662   | A | G | 0.580 | 0.029 |
| rs7559658  | 2  | chr2:147920213  | C | T | 0.189 | 0.034 |
| rs756145   | 9  | chr9:1039939    | A | G | 0.306 | 0.029 |
| rs7561798  | 2  | chr2:228973660  | G | A | 0.481 | 0.028 |
| rs7568172  | 2  | chr2:158335340  | G | A | 0.937 | 0.067 |
| rs75686861 | 4  | chr4:145621328  | A | G | 0.092 | 0.047 |
| rs75693095 | 7  | chr7:23440057   | C | G | 0.022 | 0.112 |
| rs75756987 | 21 | chr21:47767295  | G | C | 0.896 | 0.044 |
| rs7609422  | 2  | chr2:146348037  | G | A | 0.408 | 0.030 |
| rs7619708  | 3  | chr3:195810187  | T | C | 0.760 | 0.033 |
| rs76263492 | 3  | chr3:54828827   | T | G | 0.043 | 0.068 |
| rs7656001  | 4  | chr4:91243865   | A | G | 0.550 | 0.026 |
| rs7660000  | 4  | chr4:89751858   | C | T | 0.718 | 0.031 |
| rs7695096  | 4  | chr4:103932556  | C | T | 0.514 | 0.038 |
| rs7719891  | 5  | chr5:86577352   | G | A | 0.247 | 0.040 |
| rs7739842  | 6  | chr6:131954797  | G | T | 0.189 | 0.033 |
| rs7756992  | 6  | chr6:20679709   | G | A | 0.265 | 0.122 |
| rs7858727  | 9  | chr9:111936128  | C | A | 0.205 | 0.034 |
| rs7867635  | 9  | chr9:20241069   | C | T | 0.411 | 0.037 |

|            |    |                 |   |   |       |       |
|------------|----|-----------------|---|---|-------|-------|
| rs7903146  | 10 | chr10:114758349 | T | C | 0.287 | 0.280 |
| rs79489938 | 1  | chr1:147121000  | G | A | 0.984 | 0.113 |
| rs798549   | 7  | chr7:2760750    | C | A | 0.269 | 0.030 |
| rs799661   | 14 | chr14:35390146  | C | T | 0.891 | 0.043 |
| rs8005994  | 14 | chr14:29744532  | A | G | 0.645 | 0.027 |
| rs8008540  | 14 | chr14:74948180  | C | T | 0.563 | 0.030 |
| rs8010382  | 14 | chr14:91963722  | G | A | 0.414 | 0.032 |
| rs8018512  | 14 | chr14:38818723  | G | A | 0.749 | 0.037 |
| rs8031576  | 15 | chr15:90380214  | C | A | 0.280 | 0.057 |
| rs8033609  | 15 | chr15:60938816  | A | C | 0.542 | 0.027 |
| rs8054556  | 16 | chr16:29958216  | A | G | 0.467 | 0.036 |
| rs8071043  | 17 | chr17:3988451   | C | T | 0.330 | 0.054 |
| rs827237   | 10 | chr10:72648336  | T | C | 0.199 | 0.037 |
| rs838735   | 2  | chr2:234324192  | C | G | 0.385 | 0.029 |
| rs844215   | 3  | chr3:71656045   | C | T | 0.583 | 0.026 |
| rs858519   | 17 | chr17:7531965   | T | C | 0.443 | 0.026 |
| rs867489   | 20 | chr20:48833957  | C | T | 0.536 | 0.031 |
| rs878017   | 10 | chr10:13566204  | A | G | 0.527 | 0.035 |
| rs890940   | 5  | chr5:158026744  | T | C | 0.211 | 0.048 |
| rs911300   | 20 | chr20:57387262  | G | A | 0.543 | 0.035 |
| rs917195   | 7  | chr7:30728452   | C | T | 0.768 | 0.047 |
| rs9275184  | 6  | chr6:32654714   | C | T | 0.103 | 0.098 |
| rs9296095  | 6  | chr6:33542523   | T | C | 0.821 | 0.034 |
| rs9316500  | 13 | chr13:51094114  | T | G | 0.704 | 0.047 |
| rs9319382  | 13 | chr13:28245127  | C | T | 0.685 | 0.028 |
| rs9368112  | 6  | chr6:19718157   | T | C | 0.529 | 0.026 |
| rs9379084  | 6  | chr6:7231843    | G | A | 0.884 | 0.075 |
| rs9383649  | 6  | chr6:153428102  | G | A | 0.403 | 0.033 |
| rs9555581  | 13 | chr13:109944192 | C | T | 0.613 | 0.030 |
| rs9563574  | 13 | chr13:58656599  | T | C | 0.827 | 0.041 |
| rs9784137  | 2  | chr2:121325908  | G | A | 0.845 | 0.061 |
| rs980183   | 2  | chr2:59311536   | G | A | 0.397 | 0.036 |
| rs9828772  | 3  | chr3:129333182  | C | G | 0.897 | 0.052 |
| rs9842137  | 3  | chr3:3649850    | T | C | 0.001 | 0.425 |
| rs9852406  | 3  | chr3:135625498  | T | C | 0.253 | 0.038 |
| rs9854769  | 3  | chr3:185520948  | G | A | 0.314 | 0.108 |
| rs9873519  | 3  | chr3:124921457  | T | C | 0.532 | 0.038 |
| rs9873618  | 3  | chr3:170733076  | G | A | 0.710 | 0.058 |
| rs987949   | 4  | chr4:85384069   | A | G | 0.010 | 0.153 |
| rs9900074  | 17 | chr17:46124326  | G | C | 0.928 | 0.055 |
| rs9912236  | 17 | chr17:77895311  | C | T | 0.754 | 0.031 |
| rs9927842  | 16 | chr16:15153717  | T | C | 0.155 | 0.038 |

Chr, chromosome.

Effect allele is the one associated with high risk of T2D; and other is the reference allele. Each SNP's relative effect size  $\beta$  was obtained from the ancestry-specific analysis of Europeans in the latest Genome-wide multi-ethnic meta-analysis.

**Supplementary Table 2.** Cluster weight for T2D Loci\*

| Loci          | SNP        | EA | Beta-Cell | Proinsulin | Obesity | Lipodystrophy | Liver |
|---------------|------------|----|-----------|------------|---------|---------------|-------|
| MTNR1B        | rs10830961 | G  | 3.81      | 0.00       | 0.27    | 0.00          | 0.00  |
| CDKAL1        | rs7756992  | G  | 3.05      | 0.00       | 0.00    | 0.11          | 0.00  |
| C2CD4A        | rs4502156  | T  | 2.68      | 0.00       | 0.00    | 0.00          | 0.64  |
| HHEX          | rs1111875  | C  | 2.66      | 0.00       | 0.14    | 0.05          | 0.17  |
| TCF7L2        | rs7903146  | T  | 2.47      | 0.29       | 0.00    | 0.74          | 0.14  |
| SLC30A8       | rs3802177  | G  | 2.41      | 0.09       | 0.00    | 0.22          | 0.23  |
| CDKN2A_B      | rs10811661 | T  | 1.77      | 0.20       | 0.32    | 0.00          | 0.00  |
| CDC123.CAMK1D | rs11257655 | T  | 1.59      | 0.78       | 0.05    | 0.00          | 0.41  |
| HNF1A         | rs7957197  | T  | 1.56      | 0.41       | 0.39    | 0.00          | 0.00  |
| AP3S2         | rs1371135  | T  | 1.54      | 0.00       | 0.07    | 0.07          | 0.07  |
| ZHX3          | rs17265513 | C  | 1.37      | 0.00       | 0.56    | 0.00          | 0.08  |
| UBE2E2        | rs1496653  | A  | 1.35      | 0.23       | 0.00    | 0.06          | 0.15  |
| ACSL1         | rs1996546  | G  | 1.35      | 0.06       | 0.00    | 0.17          | 0.51  |
| PRC1          | rs12899811 | G  | 1.26      | 0.00       | 0.14    | 0.00          | 0.00  |
| GIPR          | rs8108269  | G  | 1.25      | 0.04       | 0.03    | 0.27          | 0.10  |
| GLP2R         | rs17676067 | C  | 1.22      | 0.00       | 0.58    | 0.00          | 0.26  |
| KCNJ11        | rs5215     | C  | 1.19      | 0.56       | 0.16    | 0.06          | 0.00  |
| KCNQ1_2       | rs233449   | G  | 1.18      | 0.62       | 0.24    | 0.03          | 0.00  |
| ABO           | rs505922   | C  | 1.17      | 0.04       | 0.66    | 0.19          | 0.44  |
| ANK1          | rs516946   | C  | 1.12      | 0.62       | 0.05    | 0.19          | 0.35  |
| GLIS3         | rs10758593 | A  | 1.09      | 0.27       | 0.00    | 0.18          | 0.44  |
| HNF1B         | rs4430796  | G  | 1.04      | 0.32       | 0.00    | 0.27          | 0.00  |
| CTRB2         | rs9921586  | G  | 1.01      | 0.00       | 0.01    | 0.43          | 0.19  |
| CDKN2A_2      | rs2184061  | A  | 0.97      | 0.00       | 0.09    | 0.32          | 0.70  |
| DUSP8         | rs2334499  | T  | 0.96      | 0.64       | 0.06    | 0.35          | 0.00  |
| ADCY5         | rs11708067 | A  | 0.92      | 0.11       | 0.00    | 1.24          | 0.18  |
| GIP           | rs15563    | G  | 0.88      | 0.20       | 0.14    | 0.50          | 0.00  |
| HNF4A         | rs4812829  | A  | 0.84      | 0.79       | 0.08    | 0.00          | 0.10  |
| HSD17B12      | rs3736505  | G  | 0.78      | 0.00       | 1.24    | 0.03          | 0.21  |
| TLE4          | rs17791513 | A  | 0.78      | 0.01       | 0.23    | 0.00          | 0.17  |
| LPP           | rs6808574  | C  | 0.73      | 0.51       | 0.34    | 0.36          | 0.00  |
| DGKB          | rs2191349  | T  | 0.72      | 0.35       | 0.26    | 0.00          | 0.64  |
| NOTCH2        | rs10923931 | T  | 0.70      | 0.00       | 0.02    | 0.17          | 0.48  |
| PLEKHA1       | rs2421016  | C  | 0.63      | 0.13       | 0.00    | 0.43          | 0.44  |
| RREB1         | rs9502570  | C  | 0.57      | 0.55       | 0.50    | 0.05          | 0.00  |
| FAF1          | rs17106184 | G  | 0.57      | 0.35       | 0.05    | 0.81          | 0.00  |
| IGF2BP2       | rs4402960  | T  | 0.56      | 0.97       | 0.00    | 0.50          | 0.00  |
| ARL15         | rs702634   | A  | 0.55      | 0.00       | 0.18    | 1.29          | 0.49  |
| PROX1         | rs340874   | C  | 0.55      | 0.52       | 0.10    | 0.50          | 0.00  |
| TSPAN8.LGR5   | rs7961581  | C  | 0.54      | 0.00       | 0.00    | 0.17          | 0.83  |
| ADAMTS9       | rs6795735  | C  | 0.54      | 0.00       | 0.18    | 0.95          | 0.16  |
| KCNQ1         | rs2237892  | C  | 0.53      | 0.30       | 0.00    | 0.32          | 0.00  |
| DGKB_2        | rs10276674 | C  | 0.47      | 1.00       | 0.14    | 0.11          | 0.19  |
| KLF14         | rs3996352  | A  | 0.46      | 0.00       | 0.00    | 1.63          | 0.40  |
| ARAP1         | rs1552224  | A  | 0.42      | 4.48       | 0.00    | 0.05          | 0.05  |
| TMEM154       | rs6813195  | C  | 0.42      | 0.10       | 0.16    | 0.31          | 0.01  |

|           |            |   |      |      |      |      |      |
|-----------|------------|---|------|------|------|------|------|
| FTO       | rs9939609  | A | 0.40 | 0.00 | 4.96 | 0.00 | 0.27 |
| JAZF1     | rs864745   | T | 0.40 | 0.00 | 0.00 | 0.68 | 0.58 |
| SPRY2     | rs1359790  | G | 0.39 | 1.07 | 0.20 | 0.27 | 0.06 |
| THADA     | rs10203174 | C | 0.39 | 0.53 | 0.20 | 0.26 | 0.11 |
| ZBED3     | rs4457053  | G | 0.39 | 0.30 | 0.04 | 0.96 | 0.00 |
| MNX1      | rs1182397  | G | 0.37 | 0.17 | 0.39 | 0.08 | 0.33 |
| KCNQ1_1   | rs231361   | A | 0.36 | 0.25 | 0.04 | 0.36 | 0.00 |
| MTMR3     | rs36608    | A | 0.34 | 0.16 | 0.43 | 0.57 | 0.22 |
| KLHDC5    | rs10842994 | C | 0.33 | 0.17 | 0.17 | 0.33 | 0.39 |
| ANKRD55_2 | rs3843467  | T | 0.32 | 0.00 | 0.19 | 1.31 | 0.15 |
| KCNQ1_3   | rs384037   | A | 0.28 | 0.04 | 0.01 | 0.38 | 0.09 |
| TP53INP1  | rs7845219  | T | 0.25 | 0.45 | 0.36 | 0.00 | 0.28 |
| CCND2_2   | rs10219509 | C | 0.22 | 0.02 | 0.27 | 0.27 | 0.09 |
| HMG20A    | rs7178572  | G | 0.21 | 0.08 | 0.25 | 0.37 | 0.00 |
| BCL11A    | rs243021   | A | 0.16 | 0.09 | 0.07 | 0.57 | 0.33 |
| PPARG     | rs1801282  | C | 0.14 | 0.06 | 0.00 | 2.11 | 0.08 |
| CDKN2A_3  | rs10757282 | C | 0.13 | 0.06 | 0.14 | 0.29 | 0.16 |
| SLC35D3   | rs4407733  | A | 0.13 | 0.42 | 0.00 | 0.65 | 0.26 |
| MPHOSPH9  | rs1106240  | T | 0.10 | 0.10 | 0.05 | 0.79 | 0.49 |
| MACF1     | rs2296172  | G | 0.09 | 0.00 | 0.74 | 1.03 | 0.08 |
| ZMIZ1     | rs12571751 | A | 0.08 | 0.19 | 0.56 | 0.63 | 0.00 |
| HNF4A_2   | rs1800961  | T | 0.08 | 0.50 | 0.29 | 0.64 | 0.38 |
| GRB14     | rs13389219 | C | 0.08 | 0.00 | 0.17 | 2.74 | 0.00 |
| HMG2      | rs2261181  | T | 0.08 | 0.14 | 0.03 | 0.74 | 0.03 |
| TLE1      | rs2796441  | G | 0.08 | 0.04 | 0.00 | 0.71 | 0.47 |
| GCKR      | rs780094   | C | 0.06 | 0.00 | 0.58 | 0.00 | 5.34 |
| LPL       | rs10503669 | C | 0.06 | 0.00 | 0.41 | 1.54 | 0.16 |
| WFS1      | rs4458523  | G | 0.04 | 0.53 | 0.25 | 0.50 | 0.39 |
| RBMS1     | rs6742799  | A | 0.03 | 0.00 | 1.04 | 0.69 | 0.26 |
| MAP3K11   | rs11227234 | T | 0.00 | 0.10 | 0.60 | 0.43 | 0.02 |
| ZZEF1     | rs8068804  | A | 0.00 | 0.00 | 0.43 | 0.57 | 0.29 |
| INS.IGF2  | rs10840595 | C | 0.00 | 0.18 | 0.20 | 0.29 | 0.37 |
| NEUROG3   | rs4746890  | T | 0.00 | 0.25 | 0.00 | 0.32 | 0.42 |
| CCND2     | rs11063069 | G | 0.00 | 0.81 | 0.01 | 0.94 | 0.13 |
| HLA.DQA1  | rs9271775  | T | 0.00 | 0.52 | 0.12 | 0.73 | 0.98 |
| ZFAND6    | rs2866367  | O | 0.00 | 0.39 | 0.20 | 0.60 | 0.01 |
| POU5F1    | rs3132524  | C | 0.00 | 0.36 | 0.24 | 1.06 | 0.32 |
| LAMA1     | rs9948462  | T | 0.00 | 0.29 | 0.30 | 0.20 | 0.41 |
| C17orf58  | rs9891146  | T | 0.00 | 0.15 | 0.59 | 1.08 | 0.00 |
| CMIP      | rs2925979  | T | 0.00 | 0.14 | 0.00 | 1.74 | 0.30 |
| MC4R      | rs12970134 | A | 0.00 | 0.12 | 2.78 | 0.37 | 0.00 |
| NRXN3     | rs10146997 | G | 0.00 | 0.07 | 1.72 | 0.37 | 0.00 |
| PNPLA3    | rs738409   | G | 0.00 | 0.04 | 0.22 | 0.59 | 0.84 |
| KIF9      | rs2276853  | A | 0.00 | 0.04 | 0.31 | 0.96 | 0.02 |
| LYPLAL1   | rs2820443  | T | 0.00 | 0.00 | 0.28 | 1.92 | 0.00 |
| IRS1      | rs2943641  | C | 0.00 | 0.00 | 0.00 | 3.01 | 0.00 |
| ANKRD55   | rs459193   | G | 0.00 | 0.00 | 0.00 | 1.80 | 0.55 |
| CILP2     | rs16996148 | T | 0.00 | 0.00 | 0.00 | 0.67 | 2.05 |

EA, effect allele.

Each SNP's cluster weight was obtained from the soft clustering analysis of GWAS results.

\*Udler MS, Kim J, von Grotthuss M, Bonàs-Guarch S, Cole JB, Chiou J; Christopher D. Anderson on behalf of METASTROKE and the ISGC, Boehnke M, Laakso M, Atzmon G, Glaser B, Mercader JM, Gaulton K, Flannick J, Getz G, Florez JC. Type 2 diabetes genetic loci informed by multi-trait associations point to disease mechanisms and subtypes: A soft clustering analysis. *PLoS Med.* 2018;15(9):e1002654. doi: 10.1371/journal.pmed.1002654.



**Supplementary Table 3.** Single-nucleotide polymorphisms associated with circulating individual FAs\*

| Type of FAs | FAs      | SNP        | Chr   | Nearby gene    | EA | NEA      | % Variance explained | Summary statistics for SNP-FA association |           |           |
|-------------|----------|------------|-------|----------------|----|----------|----------------------|-------------------------------------------|-----------|-----------|
|             |          |            |       |                |    |          |                      | Beta†                                     | SE        | P         |
| n-3 PUFAs   | ALA      | rs174547   | 11    | FADS1          | C  | T        | 1                    | 0.02                                      | 0.001     | 3.50E-64  |
|             | EPA      | rs3798713  | 6     | ELOVL2         | C  | G        | 0.4                  | 0.04                                      | 0.005     | 1.90E-12  |
|             |          | rs174538   | 11    | FADS1/C11orf10 | G  | A        | 1.7                  | 0.08                                      | 0.005     | 5.40E-58  |
|             | DPA      | rs780094   | 2     | GCKR           | T  | C        | 0.5                  | 0.02                                      | 0.003     | 9.00E-09  |
|             |          | rs3734398  | 6     | ELOVL2         | C  | T        | 2.7                  | 0.04                                      | 0.003     | 9.70E-43  |
|             | DHA      | rs174547   | 11    | FADS1          | T  | C        | 8.4                  | 0.08                                      | 0.003     | 3.80E-154 |
| n-6 PUFAs   | LA       | rs2236212  | 6     | ELOVL2         | G  | C        | 0.7                  | 0.11                                      | 0.014     | 1.30E-15  |
|             |          | rs10740118 | 10    | JMJD1C         | G  | C        | 0.2-0.7              | 0.25                                      | 0.050     | 8.10E-09  |
|             | rs174547 | 11         | FADS1 | C              | T  | 7.6-18.1 | 1.47                 | 0.050                                     | 5.00E-274 |           |
|             | AA       | rs16966952 | 16    | NTAN1          | G  | A        | 0.5-2.5              | 0.35                                      | 0.040     | 1.20E-15  |
|             |          | rs174547   | 11    | FADS1          | T  | C        | 3.7-37.6             | 1.69                                      | 0.020     | 3.30E-971 |
| n-7 MUFAs   | POA      | rs16966952 | 16    | NTAN1          | G  | A        | 0.1-0.6              | 0.20                                      | 0.030     | 2.40E-10  |
|             |          | rs780093   | 2     | GCKR           | T  | C        | 0.2-0.9              | 0.02                                      | 0.003     | 9.80E-10  |
|             |          | rs6722456  | 2     | RN7SKP93       | G  | A        | 0.01-0.6             | 0.05                                      | 0.009     | 4.10E-08  |
|             |          | rs603424   | 10    | SCD/PKD2L1     | G  | A        | 0.3-1.6              | 0.03                                      | 0.004     | 5.70E-15  |
|             |          | rs11190604 | 10    | HIF1AN         | G  | A        | 0.02-0.7             | 0.02                                      | 0.004     | 5.70E-09  |
| n-9 MUFAs   | OA       | rs102275   | 11    | FADS1/2        | C  | T        | 0.15-1.0             | 0.02                                      | 0.003     | 6.60E-13  |
|             |          | rs102275   | 11    | FADS1/2        | C  | T        | 0.3-2.1              | 0.23                                      | 0.020     | 2.20E-32  |
| SFAs        | PA       | rs2391388  | 1     | ALG14          | C  | A        | 0.2-1.0              | 0.18                                      | 0.030     | 2.70E-11  |
|             | SA       | rs6675668  | 1     | ALG14          | G  | T        | 0.4-1.4              | 0.17                                      | 0.020     | 2.20E-18  |
|             |          | rs11119805 | 1     | LPGAT1         | T  | A        | 0.01-0.7             | 0.17                                      | 0.030     | 2.80E-09  |
|             |          | rs102275   | 11    | FADS1/2        | T  | C        | 0.3-1.2              | 0.18                                      | 0.020     | 1.30E-20  |

AA, arachidonic acid; ALA,  $\alpha$ -linolenic acid; Chr, chromosome; DHA, docosahexaenoic acid; DPA, docosapentaenoic acid; EA, effect allele; EAF, effect allele frequency; EPA, eicosapentaenoic acid; FA, fatty acid; LA, linoleic acid; MUFA, monounsaturated fatty acid; OA, oleic acid; PA, palmitic acid; POA, palmitoleic acid; PUFA, polyunsaturated fatty acid; SA, stearic acid; SD, standard deviation; SFA, saturated fatty acid; SNP, single-nucleotide polymorphisms.

\*Yuan S, Larsson SC. Plasma phospholipid fatty acids and risk of atrial fibrillation: A mendelian randomization study. *Nutrients*. 2019;11(7):1651. doi: 10.3390/nu11071651.

†The beta coefficients represent the change in the percentage of total fatty acids for each additional effect allele.

**Supplementary Table 4.** Components and scaling methods of diet quality score used in the UK Biobank study

| Components                | Field IDs                                                                                                                                                                                                       | Amount per serving                                                                | Criteria for maximum score (10) | Criteria for minimum score (0) |
|---------------------------|-----------------------------------------------------------------------------------------------------------------------------------------------------------------------------------------------------------------|-----------------------------------------------------------------------------------|---------------------------------|--------------------------------|
| Fruit                     | 1309 (pieces fresh fruit/day) 1319 (pieces dried fruit/day)                                                                                                                                                     | 1309 – 1 piece<br>1319 – 5 pieces                                                 | ≥3 servings/day                 | 0 servings/day                 |
| Vegetable                 | 1289 (tablespoons cooked vegetables/day) 1299 (salad/raw vegetables/day)                                                                                                                                        | 3 heaped tablespoons                                                              | ≥3 servings/day                 | 0 servings/day                 |
| Fish                      | 1329 (oily fish/week)<br>1339 (non-oily fish/week)                                                                                                                                                              | Once/week                                                                         | ≥2 servings/week                | 0 servings/week                |
| Whole grains              | 1438, 1448 (wholemeal/wholegrain bread slices/week)<br>1458, 1468 (bran/oat/muesli cereal bowls/week)                                                                                                           | 1438/1448 – 1 slice/day<br>1458/1468 – 1 bowl/day                                 | ≥3 servings/day                 | 0 servings/day                 |
| Dairy                     | 1408 (cheese/week)<br>1418 (milk type)                                                                                                                                                                          | 1408 – 1 piece/day<br>1418 – 1 glass/day if consumption of any type of milk       | ≥2 servings/day                 | 0 servings/day                 |
| Vegetable oils            | 1428 (Flora Pro-Active/Benecol spread)<br>2654 (Flora Pro-Active/Benecol, soft margarine -, olive oil based -, polyunsaturated/sunflower oil based -, other low/reduced fat spread)<br>1438 (bread slices/week) | 1 serving/day if in combination with eating at least 2 slices of bread (ID 1438)  | ≥2 servings/day                 | 0 servings/day                 |
| Refined grains            | 1438, 1448 (white, brown, other bread slices/week) 1458, 1468 (biscuit, other cereals/week)                                                                                                                     | 1438/1448 – 1 slice/day<br>1458/1468 – 1 bowl/day                                 | 0 servings/day                  | >2 servings/day                |
| Processed meats           | 1349 (processed meat/week or daily)<br>3680 (age when last ate meat)                                                                                                                                            | 1349 – 1 piece/day<br>3680 – 0 pieces/day if indicated having never eaten meat    | 0 serving/week                  | >1 serving/week                |
| Unprocessed red meats     | 1369 (beef/week or day)<br>1379 (lamb or mutton/week or day)<br>1389 (pork/week or day)<br>3680 (age when last ate meat)                                                                                        | 1359-1389 – once/week<br>3680 – 0 pieces/day if indicated having never eaten meat | 0 serving/week                  | >2 serving/week                |
| Sugar-sweetened beverages | 6144 (never consumes drinks containing sugar)                                                                                                                                                                   | 0 servings                                                                        | Don't drink                     | Drink                          |

Field IDs and serving sizes used per diet component in UK Biobank with available data from the general baseline questionnaire. Intermediate intakes were scored between the minimum and the maximum according to the following formula: component score = (maximum score / ( $A_{\max} - A_{\min}$ ))  $\times$  ( $X - A_{\min}$ ) for adequacy components; component score = (maximum score - minimum score / ( $A_{\max} - A_{\min}$ ))  $\times$  ( $X - A_{\min}$ ) for moderate components (refined grains, processed meat, and unprocessed red meat);  $A_{\max}$  is maximum amount of the component corresponding to the recommended intake;  $A_{\min}$  is minimum amount of the component corresponding to the recommended intake;  $X$  is amount consumed by the individual. The total diet quality score was the sum of all the diet component scores and ranged from 0 to 100.

**Supplementary Table 5.** Definitions of prevalent diabetes and incident T2D

|                                                                                                                                                                                                        | ICD-9     | ICD-10                       | Self-reported fields                                                  |
|--------------------------------------------------------------------------------------------------------------------------------------------------------------------------------------------------------|-----------|------------------------------|-----------------------------------------------------------------------|
| Diabetes at baseline [Both<br>“possible” diabetes (T1D, T2D<br>and other types of diabetes)<br>and<br>“probable” diabetes (T1D, T2D<br>and other types of diabetes)<br>were<br>excluded at baseline.]* | 250, 6480 | E10, E11, E12, E13, E14, O24 | 2443(1), 2976, 6153(3),<br>6177(3), 20002(1220,<br>1222, 1223), 20003 |
| Incident T2D                                                                                                                                                                                           |           | E11                          |                                                                       |

\*Eastwood SV, Mathur R, Atkinson M, et al. Algorithms for the capture and adjudication of prevalent and incident diabetes in UK Biobank. PLoS One. 2016. 11(9): e0162388.

**Supplementary Table 6.** The percentages of participants with missing covariates

| Covariates                           | %     |
|--------------------------------------|-------|
| Ethnicity                            | 0.43  |
| Body mass index (m <sup>2</sup> /kg) | 0.32  |
| Education                            | 1.14  |
| Townsend deprivation index           | 0.13  |
| Household income                     | 14.02 |
| Smoking status                       | 0.46  |
| Alcohol consumption                  | 0.20  |
| Physical activity (MET-h/wk)         | 18.72 |

**Supplementary Table 7.** Spearman correlations between plasma fatty acids (% of total fatty acids)

|                   | SFAs | MUFAs | PUFAs | n-6 PUFAs | LA    | non-LA n-6 PUFAs | n-3 PUFAs | DHA   | non-DHA n-3 PUFAs |
|-------------------|------|-------|-------|-----------|-------|------------------|-----------|-------|-------------------|
| SFAs              | 1.00 | 0.26  | -0.69 | -0.65     | -0.64 | -0.09            | -0.13     | -0.27 | -0.01             |
| MUFAs             |      | 1.00  | -0.86 | -0.74     | -0.47 | -0.56            | -0.29     | -0.65 | -0.03             |
| PUFAs             |      |       | 1.00  | 0.88      | 0.67  | 0.45             | 0.28      | 0.61  | 0.03              |
| n-6 PUFAs         |      |       |       | 1.00      | 0.83  | 0.37             | -0.14     | 0.26  | -0.38             |
| LA                |      |       |       |           | 1.00  | -0.14            | -0.25     | 0.06  | -0.41             |
| non-LA n-6 PUFAs  |      |       |       |           |       | 1.00             | 0.19      | 0.43  | 0.01              |
| n-3 PUFAs         |      |       |       |           |       |                  | 1.00      | 0.83  | 0.93              |
| DHA               |      |       |       |           |       |                  |           | 1.00  | 0.60              |
| non-DHA n-3 PUFAs |      |       |       |           |       |                  |           |       | 1.00              |

DHA, docosahexaenoic acid; LA, linoleic acid; MUFA, monounsaturated fatty acid; PUFA, polyunsaturated fatty acid; SFA, saturated fatty acid.  $P < 0.001$  for all correlations.

**Supplementary Table 8.** Associations between plasma PUFAs and type 2 diabetes risk

|                          | Quartiles of plasma fatty acids (% of total fatty acids) |                  |                  |                  | P trend | HR (95% CI)*     |
|--------------------------|----------------------------------------------------------|------------------|------------------|------------------|---------|------------------|
|                          | Q1                                                       | Q2               | Q3               | Q4               |         |                  |
| <b>LA</b>                |                                                          |                  |                  |                  |         |                  |
| Range                    | ≤27.3                                                    | 27.3-29.5        | 29.5-31.6        | ≥31.6            |         |                  |
| Median                   | 25.6                                                     | 28.5             | 30.5             | 33.0             |         |                  |
| Cases/person-years       | 1525/271825                                              | 741/276859       | 462/279717       | 324/282239       |         |                  |
| Model 1†                 | 1.00                                                     | 0.50 (0.46-0.55) | 0.33 (0.29-0.36) | 0.24 (0.21-0.27) | <0.001  | 0.49 (0.48-0.52) |
| Model 2‡                 | 1.00                                                     | 0.66 (0.60-0.72) | 0.50 (0.45-0.56) | 0.40 (0.35-0.46) | <0.001  | 0.63 (0.60-0.66) |
| Model 3§                 | 1.00                                                     | 0.80 (0.72-0.89) | 0.66 (0.57-0.77) | 0.56 (0.46-0.69) | <0.001  | 0.67 (0.62-0.72) |
| <b>non-LA n-6 PUFAs</b>  |                                                          |                  |                  |                  |         |                  |
| Range                    | ≤7.6                                                     | 7.6-8.8          | 8.8-10.1         | ≥10.1            |         |                  |
| Median                   | 6.9                                                      | 8.2              | 9.4              | 11.1             |         |                  |
| Cases/person-years       | 1030/277421                                              | 754/278201       | 673/277900       | 595/277119       |         |                  |
| Model 1†                 | 1.00                                                     | 0.74 (0.67-0.81) | 0.68 (0.62-0.75) | 0.61 (0.56-0.68) | <0.001  | 0.83 (0.80-0.86) |
| Model 2‡                 | 1.00                                                     | 0.78 (0.71-0.85) | 0.69 (0.63-0.77) | 0.53 (0.47-0.59) | <0.001  | 0.78 (0.75-0.81) |
| Model 3§                 | 1.00                                                     | 0.87 (0.79-0.96) | 0.87 (0.77-0.97) | 0.75 (0.64-0.87) | <0.001  | 0.89 (0.84-0.95) |
| <b>DHA</b>               |                                                          |                  |                  |                  |         |                  |
| Range                    | ≤1.6                                                     | 1.6-1.9          | 1.9-2.4          | ≥2.4             |         |                  |
| Median                   | 1.3                                                      | 1.7              | 2.1              | 2.7              |         |                  |
| Cases/person-years       | 1376/274136                                              | 741/277778       | 505/279201       | 430/279526       |         |                  |
| Model 1†                 | 1.00                                                     | 0.53 (0.48-0.58) | 0.35 (0.32-0.39) | 0.29 (0.26-0.32) | <0.001  | 0.56 (0.53-0.58) |
| Model 2‡                 | 1.00                                                     | 0.68 (0.62-0.75) | 0.54 (0.48-0.60) | 0.49 (0.44-0.55) | <0.001  | 0.72 (0.68-0.75) |
| Model 3§                 | 1.00                                                     | 0.92 (0.83-1.02) | 0.85 (0.75-0.98) | 0.95 (0.79-1.14) | 0.288   | 0.93 (0.87-1.00) |
| <b>non-DHA n-3 PUFAs</b> |                                                          |                  |                  |                  |         |                  |
| Range                    | ≤1.7                                                     | 1.7-2.3          | 2.3-2.9          | ≥2.9             |         |                  |
| Median                   | 1.3                                                      | 2.0              | 2.6              | 3.5              |         |                  |
| Cases/person-years       | 704/277929                                               | 793/277645       | 822/277581       | 733/277486       |         |                  |
| Model 1†                 | 1.00                                                     | 1.05 (0.95-1.17) | 1.05 (0.95-1.16) | 0.90 (0.81-1.00) | 0.025   | 0.96 (0.92-0.99) |
| Model 2‡                 | 1.00                                                     | 1.02 (0.92-1.13) | 1.02 (0.92-1.14) | 0.93 (0.83-1.04) | 0.178   | 0.98 (0.94-1.01) |
| Model 3§                 | 1.00                                                     | 0.87 (0.78-0.97) | 0.82 (0.73-0.92) | 0.75 (0.64-0.87) | <0.001  | 0.90 (0.85-0.96) |

CI, confidence interval; HR, hazard ratio; MUFA, monounsaturated fatty acid; PUFA, polyunsaturated fatty acid; SFA, saturated fatty acid.

\*Indicates hazard ratio of type 2 diabetes for 1 SD increment in plasma fatty acids.

†Model 1 was adjusted for age and sex.

‡Model 2 was further adjusted for race (White, Asian, Black, mixed, or other ethnic group), centers (22 categories), BMI (in kg/m<sup>2</sup>; <18.5, 18.5 to 25, 25 to 30, 30 to 35, ≥35, or missing), education (college or university degree, vocational qualifications, optional national exams at ages 17–18 years, national exams at age 16 years, others, or missing), Townsend deprivation index (quartiles), household income (<£18,000, £18,000–£30,999, £31,000–£51,999, £52,000–£100,000, >£100,000, or missing), smoking (never, former, current, or missing), alcohol consumption (never or special occasions only, 1 to 3 times/month, 1 or 2 times/week, 3 or 4 times/week, or daily/almost daily), physical activity (in MET-h/wk; quartiles), history of hypertension (yes or no), history of high cholesterol (yes or no), family history of diabetes (yes or no), vitamin supplement use (yes or no), mineral supplement use (yes or no), and aspirin use (yes or no).

§Model 3 was further adjusted for remaining plasma fatty acids (SFAs, MUFAs, LA, non-LA n-6 PUFAs, DHA, and non-DHA n-3 PUFAs).



**Supplementary Table 9.** Interactions between plasma PUFAs and GRS/cluster GRSs for T2D

|                   | Plasma FAs |       |          | GRS     |       |          | Plasma FAs×GRS |       |          |
|-------------------|------------|-------|----------|---------|-------|----------|----------------|-------|----------|
|                   | $\beta$    | SE    | <i>P</i> | $\beta$ | SE    | <i>P</i> | $\beta$        | SE    | <i>P</i> |
| LA                | -0.440     | 0.045 | <0.001   | 0.410   | 0.024 | <0.001   | -0.007         | 0.023 | 0.767    |
| non-LA n-6 PUFAs  | -0.129     | 0.034 | <0.001   | 0.411   | 0.020 | <0.001   | -0.015         | 0.021 | 0.477    |
| DHA               | -0.077     | 0.039 | 0.049    | 0.411   | 0.022 | <0.001   | -0.004         | 0.022 | 0.867    |
| non-DHA n-3 PUFAs | -0.126     | 0.036 | <0.001   | 0.413   | 0.020 | <0.001   | -0.016         | 0.022 | 0.467    |

  

|                   | Plasma FAs |       |          | Beta cell GRS |       |          | Plasma FAs×Beta cell GRS |       |          |
|-------------------|------------|-------|----------|---------------|-------|----------|--------------------------|-------|----------|
|                   | $\beta$    | SE    | <i>P</i> | $\beta$       | SE    | <i>P</i> | $\beta$                  | SE    | <i>P</i> |
| LA                | -0.455     | 0.044 | <0.001   | 0.221         | 0.024 | <0.001   | 0.010                    | 0.022 | 0.662    |
| non-LA n-6 PUFAs  | -0.128     | 0.033 | <0.001   | 0.213         | 0.020 | <0.001   | -0.003                   | 0.021 | 0.898    |
| DHA               | -0.090     | 0.038 | 0.018    | 0.228         | 0.022 | <0.001   | 0.030                    | 0.021 | 0.153    |
| non-DHA n-3 PUFAs | -0.131     | 0.035 | <0.001   | 0.214         | 0.019 | <0.001   | 0.021                    | 0.022 | 0.328    |

  

|                   | Plasma FAs |       |          | Proinsulin GRS |       |          | Plasma FAs×Proinsulin GRS |       |          |
|-------------------|------------|-------|----------|----------------|-------|----------|---------------------------|-------|----------|
|                   | $\beta$    | SE    | <i>P</i> | $\beta$        | SE    | <i>P</i> | $\beta$                   | SE    | <i>P</i> |
| LA                | -0.447     | 0.044 | <0.001   | 0.084          | 0.024 | <0.001   | 0.002                     | 0.023 | 0.929    |
| non-LA n-6 PUFAs  | -0.129     | 0.033 | <0.001   | 0.084          | 0.021 | <0.001   | -0.003                    | 0.022 | 0.909    |
| DHA               | -0.085     | 0.038 | 0.024    | 0.093          | 0.023 | <0.001   | 0.018                     | 0.022 | 0.415    |
| non-DHA n-3 PUFAs | -0.128     | 0.035 | <0.001   | 0.084          | 0.020 | <0.001   | 0.029                     | 0.023 | 0.207    |

  

|                   | Plasma FAs |       |          | Obesity GRS |       |          | Plasma FAs×Obesity GRS |       |          |
|-------------------|------------|-------|----------|-------------|-------|----------|------------------------|-------|----------|
|                   | $\beta$    | SE    | <i>P</i> | $\beta$     | SE    | <i>P</i> | $\beta$                | SE    | <i>P</i> |
| LA                | -0.447     | 0.044 | <0.001   | 0.027       | 0.023 | 0.253    | -0.002                 | 0.022 | 0.928    |
| non-LA n-6 PUFAs  | -0.133     | 0.033 | <0.001   | 0.033       | 0.020 | 0.092    | 0.024                  | 0.021 | 0.238    |
| DHA               | -0.086     | 0.038 | 0.025    | 0.047       | 0.022 | 0.030    | 0.041                  | 0.021 | 0.055    |
| non-DHA n-3 PUFAs | -0.127     | 0.035 | <0.001   | 0.028       | 0.019 | 0.146    | 0.039                  | 0.022 | 0.074    |

  

|                   | Plasma FAs |       |          | Lipodystrophy GRS |       |          | Plasma FAs×Lipodystrophy GRS |       |          |
|-------------------|------------|-------|----------|-------------------|-------|----------|------------------------------|-------|----------|
|                   | $\beta$    | SE    | <i>P</i> | $\beta$           | SE    | <i>P</i> | $\beta$                      | SE    | <i>P</i> |
| LA                | -0.441     | 0.044 | <0.001   | 0.107             | 0.024 | <0.001   | -0.010                       | 0.022 | 0.647    |
| non-LA n-6 PUFAs  | -0.131     | 0.033 | <0.001   | 0.121             | 0.020 | <0.001   | 0.029                        | 0.021 | 0.169    |
| DHA               | -0.078     | 0.038 | 0.040    | 0.112             | 0.022 | <0.001   | -0.005                       | 0.022 | 0.833    |
| non-DHA n-3 PUFAs | -0.130     | 0.035 | <0.001   | 0.115             | 0.020 | <0.001   | 0.014                        | 0.022 | 0.534    |

  

|                   | Plasma FAs |       |          | Liver/Lipid GRS |       |          | Plasma FAs×Liver/Lipid GRS |       |          |
|-------------------|------------|-------|----------|-----------------|-------|----------|----------------------------|-------|----------|
|                   | $\beta$    | SE    | <i>P</i> | $\beta$         | SE    | <i>P</i> | $\beta$                    | SE    | <i>P</i> |
| LA                | -0.457     | 0.044 | <0.001   | 0.085           | 0.024 | <0.001   | -0.014                     | 0.022 | 0.529    |
| non-LA n-6 PUFAs  | -0.135     | 0.033 | <0.001   | 0.085           | 0.020 | <0.001   | -0.010                     | 0.021 | 0.643    |
| DHA               | -0.082     | 0.038 | 0.031    | 0.104           | 0.022 | <0.001   | 0.035                      | 0.022 | 0.107    |
| non-DHA n-3 PUFAs | -0.120     | 0.035 | <0.001   | 0.087           | 0.020 | <0.001   | 0.041                      | 0.022 | 0.061    |

CI, confidence interval; FA, fatty acid; GRS, genetic risk score; HR, hazard ratio; MUFA, monounsaturated fatty acid; PUFA, polyunsaturated fatty acid; SFA, saturated fatty acid.

Cox proportional hazards regression models for type 2 diabetes were performed using standardized

values of plasma fatty acids and GRS.  $\beta$  coefficients were adjusted for age, sex, centers, BMI, education, Townsend deprivation index, household income, smoking, alcohol consumption, physical activity, history of hypertension, history of high cholesterol, vitamin supplement use, mineral supplement use, aspirin use, and remaining plasma fatty acids (SFAs, MUFAs, LA, non-LA n-6 PUFAs, DHA, and non-DHA n-3 PUFAs).

**Supplementary Table 10.** Interactions between plasma FAs and number of FA-associated alleles for T2D

|                         |                   | Number of alleles |       |          | FAs     |       |          | Number of alleles×FAs |       |          |
|-------------------------|-------------------|-------------------|-------|----------|---------|-------|----------|-----------------------|-------|----------|
|                         |                   | $\beta$           | SE    | <i>P</i> | $\beta$ | SE    | <i>P</i> | $\beta$               | SE    | <i>P</i> |
| SFA-associated alleles  | SFAs              | 0.018             | 0.022 | 0.419    | -0.017  | 0.032 | 0.598    | 0.010                 | 0.006 | 0.106    |
| MUFA-associated alleles | MUFAs             | -0.022            | 0.012 | 0.058    | 0.094   | 0.030 | 0.002    | -0.008                | 0.004 | 0.052    |
| LA-associated alleles   | n-6 PUFAs         | -0.021            | 0.020 | 0.297    | -0.464  | 0.079 | <0.001   | 0.010                 | 0.019 | 0.609    |
|                         | LA                | -0.033            | 0.020 | 0.098    | -0.411  | 0.076 | <0.001   | -0.011                | 0.019 | 0.570    |
|                         | non-LA n-6 PUFAs  | -0.021            | 0.017 | 0.229    | -0.252  | 0.067 | <0.001   | 0.035                 | 0.017 | 0.040    |
| AA-associated alleles   | n-6 PUFAs         | 0.031             | 0.026 | 0.238    | -0.463  | 0.078 | <0.001   | 0.012                 | 0.025 | 0.618    |
|                         | LA                | 0.025             | 0.026 | 0.331    | -0.441  | 0.077 | <0.001   | -0.002                | 0.024 | 0.939    |
|                         | non-LA n-6 PUFAs  | 0.040             | 0.023 | 0.085    | -0.233  | 0.069 | <0.001   | 0.036                 | 0.023 | 0.112    |
| EPA-associated alleles  | n-3 PUFAs         | -0.005            | 0.021 | 0.817    | -0.040  | 0.059 | 0.496    | -0.034                | 0.023 | 0.139    |
|                         | DHA               | -0.006            | 0.024 | 0.808    | -0.028  | 0.061 | 0.649    | -0.025                | 0.022 | 0.255    |
|                         | non-DHA n-3 PUFAs | 0.005             | 0.021 | 0.810    | -0.048  | 0.060 | 0.426    | -0.037                | 0.023 | 0.107    |
| DPA-associated alleles  | n-3 PUFAs         | -0.043            | 0.017 | 0.013    | 0.026   | 0.061 | 0.676    | -0.045                | 0.019 | 0.017    |
|                         | DHA               | -0.050            | 0.019 | 0.009    | 0.024   | 0.063 | 0.711    | -0.038                | 0.018 | 0.037    |
|                         | non-DHA n-3 PUFAs | -0.032            | 0.017 | 0.053    | 0.006   | 0.063 | 0.918    | -0.042                | 0.018 | 0.023    |

FA, fatty acid; MUFA, monounsaturated fatty acid; PUFA, polyunsaturated fatty acid; SFA, saturated fatty acid; T2D, type 2 diabetes.

$\beta$  coefficients were estimated using standardized values of plasma fatty acids from Cox proportional hazards models adjusted for age, sex, centers, BMI, education, Townsend deprivation index, household income, smoking, alcohol consumption, physical activity, history of hypertension, history of high cholesterol, vitamin supplement use, mineral supplement use, aspirin use, and remaining plasma fatty acids (SFAs, MUFAs, PUFAs, n-6 PUFAs, LA, non-LA n-6 PUFAs, n-3 PUFAs, DHA, and non-DHA n-3 PUFAs).

**Supplementary Table 11.** Interactions between plasma FAs and individual FA-associated SNPs for T2D

|                   |                   | SNP     |       |          | FAs       |       |          | SNPxFAs |       |              |
|-------------------|-------------------|---------|-------|----------|-----------|-------|----------|---------|-------|--------------|
|                   |                   | $\beta$ | SE    | <i>P</i> | $\beta^*$ | SE    | <i>P</i> | $\beta$ | SE    | <i>P</i>     |
| <b>rs2391388</b>  | SFAs              | 0.027   | 0.028 | 0.328    | 0.017     | 0.012 | 0.138    | 0.016   | 0.010 | 0.104        |
| <b>rs6675668</b>  | SFAs              | -0.029  | 0.028 | 0.292    | 0.030     | 0.022 | 0.166    | -0.003  | 0.020 | 0.894        |
| <b>rs11119805</b> | SFAs              | -0.017  | 0.041 | 0.679    | 0.050     | 0.030 | 0.094    | -0.012  | 0.016 | 0.454        |
| <b>rs102275</b>   | SFAs              | 0.041   | 0.029 | 0.160    | 0.016     | 0.013 | 0.199    | 0.011   | 0.008 | 0.148        |
| <b>rs780093</b>   | MUFAs             | -0.078  | 0.032 | 0.015    | 0.063     | 0.025 | 0.013    | -0.033  | 0.026 | 0.193        |
| <b>rs6722456</b>  | MUFAs             | 0.003   | 0.095 | 0.971    | 0.035     | 0.062 | 0.568    | -0.003  | 0.032 | 0.935        |
| <b>rs603424</b>   | MUFAs             | 0.025   | 0.043 | 0.561    | 0.097     | 0.084 | 0.251    | -0.034  | 0.042 | 0.428        |
| <b>rs11190604</b> | MUFAs             | -0.041  | 0.035 | 0.248    | 0.027     | 0.009 | 0.004    | 0.017   | 0.017 | 0.300        |
| <b>rs102275</b>   | MUFAs             | -0.017  | 0.029 | 0.562    | 0.051     | 0.011 | <0.001   | -0.015  | 0.008 | 0.070        |
| <b>rs10740118</b> | n-6 PUFAs         | 0.012   | 0.034 | 0.721    | -0.438    | 0.061 | <0.001   | 0.006   | 0.032 | 0.853        |
|                   | LA                | 0.002   | 0.034 | 0.963    | -0.429    | 0.058 | <0.001   | -0.015  | 0.032 | 0.642        |
|                   | non-LA n-6 PUFAs  | 0.019   | 0.029 | 0.513    | -0.172    | 0.049 | <0.001   | 0.034   | 0.030 | 0.262        |
| <b>rs174547</b>   | PUFAs             | -0.047  | 0.037 | 0.203    | -0.505    | 0.056 | <0.001   | 0.002   | 0.034 | 0.958        |
|                   | n-6 PUFAs         | -0.073  | 0.037 | 0.047    | -0.431    | 0.052 | <0.001   | 0.000   | 0.033 | 1.000        |
|                   | LA                | -0.081  | 0.036 | 0.025    | -0.440    | 0.050 | <0.001   | -0.006  | 0.032 | 0.862        |
|                   | non-LA n-6 PUFAs  | -0.088  | 0.032 | 0.007    | -0.144    | 0.040 | <0.001   | -0.003  | 0.032 | 0.919        |
| <b>rs16966952</b> | n-6 PUFAs         | -0.011  | 0.037 | 0.772    | -0.467    | 0.066 | <0.001   | 0.027   | 0.035 | 0.449        |
|                   | LA                | -0.031  | 0.036 | 0.392    | -0.433    | 0.064 | <0.001   | -0.010  | 0.034 | 0.762        |
|                   | non-LA n-6 PUFAs  | -0.008  | 0.031 | 0.805    | -0.237    | 0.056 | <0.001   | 0.077   | 0.033 | <b>0.019</b> |
| <b>rs174547</b>   | n-3 PUFAs         | -0.065  | 0.032 | 0.043    | -0.135    | 0.039 | <0.001   | 0.005   | 0.033 | 0.880        |
|                   | DHA               | -0.076  | 0.036 | 0.034    | -0.086    | 0.046 | 0.059    | 0.006   | 0.032 | 0.841        |
|                   | non-DHA n-3 PUFAs | -0.076  | 0.031 | 0.016    | -0.165    | 0.044 | <0.001   | 0.018   | 0.032 | 0.577        |
| <b>rs3798713</b>  | n-3 PUFAs         | -0.072  | 0.029 | 0.012    | -0.068    | 0.040 | 0.092    | -0.053  | 0.033 | 0.104        |
|                   | DHA               | -0.084  | 0.032 | 0.008    | -0.048    | 0.046 | 0.296    | -0.043  | 0.031 | 0.167        |
|                   | non-DHA n-3 PUFAs | -0.062  | 0.028 | 0.027    | -0.087    | 0.044 | 0.046    | -0.042  | 0.032 | 0.185        |
| <b>rs174538</b>   | n-3 PUFAs         | 0.082   | 0.033 | 0.013    | -0.131    | 0.055 | 0.017    | -0.002  | 0.034 | 0.950        |
|                   | DHA               | 0.097   | 0.037 | 0.008    | -0.084    | 0.057 | 0.137    | 0.002   | 0.033 | 0.942        |
|                   | non-DHA n-3 PUFAs | 0.091   | 0.032 | 0.004    | -0.128    | 0.057 | 0.025    | -0.019  | 0.033 | 0.561        |

|                  |                   |        |       |        |        |       |        |        |       |       |
|------------------|-------------------|--------|-------|--------|--------|-------|--------|--------|-------|-------|
| <b>rs780094</b>  | n-3 PUFAs         | -0.106 | 0.029 | <0.001 | -0.066 | 0.039 | 0.088  | -0.058 | 0.033 | 0.080 |
|                  | DHA               | -0.121 | 0.032 | <0.001 | -0.040 | 0.045 | 0.372  | -0.054 | 0.032 | 0.091 |
|                  | non-DHA n-3 PUFAs | -0.095 | 0.028 | <0.001 | -0.086 | 0.042 | 0.042  | -0.046 | 0.032 | 0.143 |
| <b>rs3734398</b> | n-3 PUFAs         | -0.068 | 0.029 | 0.018  | -0.063 | 0.040 | 0.115  | -0.059 | 0.033 | 0.073 |
|                  | DHA               | -0.080 | 0.032 | 0.012  | -0.046 | 0.046 | 0.316  | -0.045 | 0.031 | 0.147 |
|                  | non-DHA n-3 PUFAs | -0.057 | 0.028 | 0.043  | -0.082 | 0.044 | 0.060  | -0.048 | 0.032 | 0.125 |
| <b>rs174547</b>  | n-3 PUFAs         | 0.065  | 0.032 | 0.043  | -0.125 | 0.052 | 0.016  | -0.005 | 0.033 | 0.880 |
|                  | DHA               | 0.076  | 0.036 | 0.034  | -0.073 | 0.054 | 0.177  | -0.006 | 0.032 | 0.841 |
|                  | non-DHA n-3 PUFAs | 0.076  | 0.031 | 0.016  | -0.129 | 0.054 | 0.018  | -0.018 | 0.032 | 0.577 |
| <b>rs2236212</b> | n-3 PUFAs         | 0.075  | 0.029 | 0.009  | -0.185 | 0.049 | <0.001 | 0.062  | 0.033 | 0.057 |
|                  | DHA               | 0.090  | 0.032 | 0.005  | -0.146 | 0.053 | 0.006  | 0.052  | 0.031 | 0.095 |
|                  | non-DHA n-3 PUFAs | 0.063  | 0.028 | 0.024  | -0.179 | 0.051 | <0.001 | 0.048  | 0.032 | 0.126 |

FA, fatty acid; MUFA, monounsaturated fatty acid; PUFA, polyunsaturated fatty acid; SFA, saturated fatty acid; T2D, type 2 diabetes.

$\beta$  coefficients were estimated using standardized values of plasma fatty acids from Cox proportional hazards models adjusted for age, sex, centers, BMI, education, Townsend deprivation index, household income, smoking, alcohol consumption, physical activity, history of hypertension, history of high cholesterol, vitamin supplement use, mineral supplement use, aspirin use, and remaining plasma fatty acids (SFAs, MUFAs, PUFAs, n-6 PUFAs, LA, non-LA n-6 PUFAs, n-3 PUFAs, DHA, and non-DHA n-3 PUFAs).

**Supplementary Table 12.** Multivariable hazard ratio (95% CIs) of T2D from subgroup analyses

|                                 | Sex                  |         |                  |         | P for interaction |
|---------------------------------|----------------------|---------|------------------|---------|-------------------|
|                                 | Women (n=53,236)     |         | Men (n=42,618)   |         |                   |
|                                 | HR (95% CI)          | P value | HR (95% CI)      | P value |                   |
| <b>Cases/person-years</b>       | 1,386/620,830        |         | 1,666/489,810    |         |                   |
| <b>Plasma SFAs</b>              | 1.04 (1.01-1.06)     | 0.002   | 1.03 (1.01-1.05) | <0.001  | 0.368             |
| <b>Plasma MUFAs</b>             | 1.06 (1.04-1.09)     | <0.001  | 1.03 (1.00-1.05) | 0.021   | 0.006             |
| <b>Plasma PUFAs</b>             | 0.51 (0.43-0.59)     | <0.001  | 0.67 (0.60-0.76) | <0.001  | <0.001            |
| <b>Plasma n-6 PUFAs</b>         | 0.57 (0.49-0.65)     | <0.001  | 0.72 (0.64-0.80) | <0.001  | <0.001            |
| <b>Plasma LA</b>                | 0.63 (0.55-0.72)     | <0.001  | 0.68 (0.61-0.76) | <0.001  | 0.027             |
| <b>Plasma non-LA n-6 PUFAs</b>  | 0.82 (0.75-0.90)     | <0.001  | 0.95 (0.88-1.02) | 0.173   | 0.005             |
| <b>Plasma n-3 PUFAs</b>         | 0.88 (0.81-0.96)     | 0.003   | 0.91 (0.85-0.98) | 0.013   | 0.604             |
| <b>Plasma DHA</b>               | 0.87 (0.78-0.97)     | 0.014   | 0.96 (0.88-1.05) | 0.383   | 0.017             |
| <b>Plasma non-DHA n-3 PUFAs</b> | 0.91 (0.83-1.00)     | 0.061   | 0.90 (0.83-0.98) | 0.011   | 0.731             |
| <b>Plasma n-6/n-3 ratio</b>     | 1.00 (0.95-1.04)     | 0.882   | 1.02 (0.98-1.07) | 0.349   | 0.489             |
|                                 | Baseline age (years) |         |                  |         | P for interaction |
|                                 | <65 (n=80,465)       |         | ≥65 (n=15,389)   |         |                   |
|                                 | HR (95% CI)          | P value | HR (95% CI)      | P value |                   |
| <b>Cases/person-years</b>       | 2,295/938,139        |         | 757/172,501      |         |                   |
| <b>Plasma SFAs</b>              | 1.03 (1.01-1.04)     | <0.001  | 1.75 (1.47-2.08) | <0.001  | 0.009             |
| <b>Plasma MUFAs</b>             | 1.03 (1.01-1.05)     | 0.001   | 1.44 (1.22-1.69) | <0.001  | 0.690             |
| <b>Plasma PUFAs</b>             | 0.63 (0.56-0.70)     | <0.001  | 0.60 (0.48-0.74) | <0.001  | 0.292             |
| <b>Plasma n-6 PUFAs</b>         | 0.67 (0.61-0.74)     | <0.001  | 0.65 (0.54-0.79) | <0.001  | 0.481             |
| <b>Plasma LA</b>                | 0.68 (0.62-0.74)     | <0.001  | 0.64 (0.54-0.76) | <0.001  | 0.597             |
| <b>Plasma non-LA n-6 PUFAs</b>  | 0.89 (0.83-0.95)     | <0.001  | 0.95 (0.84-1.07) | 0.406   | 0.271             |
| <b>Plasma n-3 PUFAs</b>         | 0.89 (0.83-0.94)     | <0.001  | 0.94 (0.84-1.04) | 0.237   | 0.088             |
| <b>Plasma DHA</b>               | 0.93 (0.86-1.01)     | 0.072   | 0.94 (0.82-1.07) | 0.327   | 0.069             |
| <b>Plasma non-DHA n-3 PUFAs</b> | 0.90 (0.84-0.97)     | 0.006   | 0.89 (0.79-1.01) | 0.074   | 0.290             |
| <b>Plasma n-6/n-3 ratio</b>     | 1.00 (0.97-1.04)     | 0.971   | 1.05 (0.98-1.14) | 0.161   | 0.650             |
|                                 | Baseline BMI         |         |                  |         | P for interaction |
|                                 | <30 (n=74,322)       |         | ≥30 (n=21,230)   |         |                   |
|                                 | HR (95% CI)          | P value | HR (95% CI)      | P value |                   |
| <b>Cases/person-years</b>       | 1,366/866,416        |         | 1,665/240,963    |         |                   |
| <b>Plasma SFAs</b>              | 1.03 (1.01-1.05)     | 0.005   | 1.03 (1.01-1.05) | <0.001  | 0.929             |
| <b>Plasma MUFAs</b>             | 1.05 (1.03-1.07)     | <0.001  | 1.02 (1.00-1.05) | 0.029   | 0.082             |
| <b>Plasma PUFAs</b>             | 0.59 (0.50-0.68)     | <0.001  | 0.64 (0.57-0.73) | <0.001  | 0.051             |
| <b>Plasma n-6 PUFAs</b>         | 0.63 (0.55-0.72)     | <0.001  | 0.70 (0.62-0.78) | <0.001  | 0.083             |
| <b>Plasma LA</b>                | 0.67 (0.59-0.76)     | <0.001  | 0.66 (0.59-0.74) | <0.001  | 0.547             |
| <b>Plasma non-LA n-6 PUFAs</b>  | 0.87 (0.79-0.95)     | 0.003   | 0.91 (0.84-0.98) | 0.017   | 0.085             |
| <b>Plasma n-3 PUFAs</b>         | 0.89 (0.82-0.96)     | 0.004   | 0.91 (0.84-0.98) | 0.011   | 0.874             |
| <b>Plasma DHA</b>               | 0.90 (0.81-0.99)     | 0.038   | 0.97 (0.88-1.06) | 0.435   | 0.047             |
| <b>Plasma non-DHA n-3 PUFAs</b> | 0.96 (0.87-1.05)     | 0.324   | 0.85 (0.78-0.92) | <0.001  | 0.551             |

|                                   |                                                |                |                                    |                |                          |
|-----------------------------------|------------------------------------------------|----------------|------------------------------------|----------------|--------------------------|
| Plasma n-6/n-3 ratio              | 1.04 (0.99-1.09)                               | 0.130          | 1.00 (0.96-1.04)                   | 0.907          | 0.459                    |
| <b>Townsend deprivation index</b> |                                                |                |                                    |                |                          |
|                                   | <b>Below median (n=47,866)</b>                 |                | <b>Above median (n=47,866)</b>     |                | <b>P for interaction</b> |
|                                   | <b>HR (95% CI)</b>                             | <b>P value</b> | <b>HR (95% CI)</b>                 | <b>P value</b> |                          |
| <b>Cases/person-years</b>         | 1,184/559,077                                  |                | 1,867/550,128                      |                |                          |
| Plasma SFAs                       | 1.02 (1.00-1.04)                               | 0.051          | 1.04 (1.02-1.06)                   | <0.001         | 0.196                    |
| Plasma MUFAs                      | 1.02 (1.00-1.05)                               | 0.091          | 1.06 (1.03-1.08)                   | <0.001         | 0.064                    |
| Plasma PUFAs                      | 0.59 (0.50-0.69)                               | <0.001         | 0.63 (0.56-0.72)                   | <0.001         | 0.255                    |
| Plasma n-6 PUFAs                  | 0.63 (0.55-0.73)                               | <0.001         | 0.69 (0.62-0.77)                   | <0.001         | 0.354                    |
| Plasma LA                         | 0.65 (0.56-0.74)                               | <0.001         | 0.68 (0.61-0.75)                   | <0.001         | 0.857                    |
| Plasma non-LA n-6 PUFAs           | 0.85 (0.76-0.94)                               | 0.001          | 0.92 (0.86-0.99)                   | 0.035          | 0.090                    |
| Plasma n-3 PUFAs                  | 0.90 (0.83-0.99)                               | 0.021          | 0.90 (0.84-0.97)                   | 0.003          | 0.455                    |
| Plasma DHA                        | 0.95 (0.85-1.06)                               | 0.330          | 0.92 (0.85-1.01)                   | 0.077          | 0.536                    |
| Plasma non-DHA n-3 PUFAs          | 0.87 (0.78-0.96)                               | 0.007          | 0.92 (0.85-1.00)                   | 0.037          | 0.473                    |
| Plasma n-6/n-3 ratio              | 1.06 (1.00-1.13)                               | 0.056          | 0.99 (0.95-1.03)                   | 0.691          | 0.126                    |
| <b>Smoking status</b>             |                                                |                |                                    |                |                          |
|                                   | <b>Never (n=53,687)</b>                        |                | <b>Previous/current (n=41,723)</b> |                | <b>P for interaction</b> |
|                                   | <b>HR (95% CI)</b>                             | <b>P value</b> | <b>HR (95% CI)</b>                 | <b>P value</b> |                          |
| <b>Cases/person-years</b>         | 1,435/626,442                                  |                | 1,591/479,197                      |                |                          |
| Plasma SFAs                       | 1.04 (1.02-1.06)                               | <0.001         | 1.02 (1.00-1.04)                   | 0.020          | 0.417                    |
| Plasma MUFAs                      | 1.05 (1.02-1.08)                               | <0.001         | 1.03 (1.01-1.05)                   | 0.015          | 0.108                    |
| Plasma PUFAs                      | 0.56 (0.48-0.66)                               | <0.001         | 0.65 (0.58-0.74)                   | <0.001         | 0.036                    |
| Plasma n-6 PUFAs                  | 0.61 (0.54-0.70)                               | <0.001         | 0.70 (0.63-0.79)                   | <0.001         | 0.008                    |
| Plasma LA                         | 0.66 (0.59-0.75)                               | <0.001         | 0.66 (0.60-0.74)                   | <0.001         | 0.043                    |
| Plasma non-LA n-6 PUFAs           | 0.85 (0.78-0.93)                               | <0.001         | 0.93 (0.86-1.01)                   | 0.084          | 0.257                    |
| Plasma n-3 PUFAs                  | 0.93 (0.86-1.00)                               | 0.055          | 0.89 (0.82-0.95)                   | 0.001          | 0.049                    |
| Plasma DHA                        | 0.94 (0.85-1.04)                               | 0.228          | 0.93 (0.85-1.02)                   | 0.144          | 0.565                    |
| Plasma non-DHA n-3 PUFAs          | 0.94 (0.85-1.03)                               | 0.151          | 0.87 (0.80-0.95)                   | 0.002          | 0.029                    |
| Plasma n-6/n-3 ratio              | 0.99 (0.95-1.04)                               | 0.751          | 1.03 (0.98-1.08)                   | 0.222          | 0.130                    |
| <b>Alcohol consumption</b>        |                                                |                |                                    |                |                          |
|                                   | <b>Never/special occasions only (n=17,288)</b> |                | <b>≥1 time/month (n=78,378)</b>    |                | <b>P for interaction</b> |
|                                   | <b>HR (95% CI)</b>                             | <b>P value</b> | <b>HR (95% CI)</b>                 | <b>P value</b> |                          |
| <b>Cases/person-years</b>         | 978/196,931                                    |                | 2,062/911,658                      |                |                          |
| Plasma SFAs                       | 1.03 (1.01-1.06)                               | 0.010          | 1.03 (1.01-1.05)                   | <0.001         | 0.963                    |
| Plasma MUFAs                      | 1.04 (1.01-1.07)                               | 0.015          | 1.03 (1.02-1.05)                   | <0.001         | 0.766                    |
| Plasma PUFAs                      | 0.65 (0.54-0.78)                               | <0.001         | 0.61 (0.54-0.68)                   | <0.001         | 0.026                    |
| Plasma n-6 PUFAs                  | 0.71 (0.61-0.84)                               | <0.001         | 0.65 (0.59-0.72)                   | <0.001         | 0.018                    |
| Plasma LA                         | 0.78 (0.67-0.91)                               | 0.001          | 0.63 (0.57-0.69)                   | <0.001         | 0.002                    |
| Plasma non-LA n-6 PUFAs           | 0.88 (0.79-0.97)                               | 0.013          | 0.89 (0.83-0.96)                   | 0.003          | 0.704                    |
| Plasma n-3 PUFAs                  | 0.92 (0.83-1.01)                               | 0.073          | 0.89 (0.83-0.95)                   | <0.001         | 0.888                    |
| Plasma DHA                        | 0.96 (0.85-1.08)                               | 0.495          | 0.93 (0.85-1.01)                   | 0.072          | 0.314                    |
| Plasma non-DHA n-3 PUFAs          | 0.89 (0.80-0.99)                               | 0.026          | 0.90 (0.84-0.98)                   | 0.010          | 0.334                    |
| Plasma n-6/n-3 ratio              | 1.01 (0.97-1.05)                               | 0.733          | 1.02 (0.97-1.07)                   | 0.403          | 0.933                    |

|                                 | Physical activity (MET-h/wk) |         |                         |         | P for interaction |
|---------------------------------|------------------------------|---------|-------------------------|---------|-------------------|
|                                 | Below median (n=38,956)      |         | Above median (n=38,958) |         |                   |
|                                 | HR (95% CI)                  | P value | HR (95% CI)             | P value |                   |
| <b>Cases/person-years</b>       | 1,298/451,193                |         | 1,005/452,615           |         |                   |
| <b>Plasma SFAs</b>              | 1.02 (1.00-1.04)             | 0.025   | 1.04 (1.01-1.07)        | 0.003   | 0.298             |
| <b>Plasma MUFAs</b>             | 1.02 (1.00-1.05)             | 0.036   | 1.05 (1.02-1.09)        | 0.005   | 0.121             |
| <b>Plasma PUFAs</b>             | 0.61 (0.53-0.70)             | <0.001  | 0.63 (0.53-0.75)        | <0.001  | 0.922             |
| <b>Plasma n-6 PUFAs</b>         | 0.67 (0.58-0.76)             | <0.001  | 0.67 (0.57-0.79)        | <0.001  | 0.995             |
| <b>Plasma LA</b>                | 0.64 (0.56-0.72)             | <0.001  | 0.70 (0.60-0.80)        | <0.001  | 0.945             |
| <b>Plasma non-LA n-6 PUFAs</b>  | 0.91 (0.83-0.99)             | 0.037   | 0.90 (0.81-1.00)        | 0.058   | 0.973             |
| <b>Plasma n-3 PUFAs</b>         | 0.92 (0.85-0.99)             | 0.031   | 0.86 (0.79-0.95)        | 0.002   | 0.673             |
| <b>Plasma DHA</b>               | 0.95 (0.86-1.05)             | 0.350   | 0.92 (0.82-1.04)        | 0.192   | 0.945             |
| <b>Plasma non-DHA n-3 PUFAs</b> | 0.90 (0.82-0.99)             | 0.030   | 0.87 (0.78-0.97)        | 0.012   | 0.713             |
| <b>Plasma n-6/n-3 ratio</b>     | 1.05 (1.00-1.11)             | 0.074   | 1.03 (0.97-1.09)        | 0.361   | 0.470             |
|                                 | History of hypertension      |         |                         |         |                   |
|                                 | No (n=44,372)                |         | Yes (n=51,482)          |         | P for interaction |
|                                 | HR (95% CI)                  | P value | HR (95% CI)             | P value |                   |
| <b>Cases/person-years</b>       | 722/521,396                  |         | 2,330/589,245           |         |                   |
| <b>Plasma SFAs</b>              | 1.03 (1.00-1.06)             | 0.046   | 1.03 (1.01-1.05)        | <0.001  | 0.939             |
| <b>Plasma MUFAs</b>             | 1.05 (1.02-1.08)             | <0.001  | 1.03 (1.01-1.05)        | 0.003   | 0.095             |
| <b>Plasma PUFAs</b>             | 0.49 (0.40-0.61)             | <0.001  | 0.66 (0.59-0.73)        | <0.001  | 0.003             |
| <b>Plasma n-6 PUFAs</b>         | 0.54 (0.45-0.65)             | <0.001  | 0.71 (0.64-0.78)        | <0.001  | 0.005             |
| <b>Plasma LA</b>                | 0.60 (0.50-0.71)             | <0.001  | 0.68 (0.62-0.75)        | <0.001  | 0.046             |
| <b>Plasma non-LA n-6 PUFAs</b>  | 0.83 (0.73-0.94)             | 0.004   | 0.92 (0.86-0.98)        | 0.015   | 0.072             |
| <b>Plasma n-3 PUFAs</b>         | 0.88 (0.79-0.99)             | 0.027   | 0.91 (0.85-0.97)        | 0.002   | 0.582             |
| <b>Plasma DHA</b>               | 0.82 (0.70-0.96)             | 0.011   | 0.96 (0.89-1.03)        | 0.268   | 0.044             |
| <b>Plasma non-DHA n-3 PUFAs</b> | 1.00 (0.88-1.13)             | 0.967   | 0.87 (0.81-0.94)        | <0.001  | 0.675             |
| <b>Plasma n-6/n-3 ratio</b>     | 1.00 (0.93-1.07)             | 0.958   | 1.01 (0.98-1.05)        | 0.398   | 0.884             |
|                                 | History of high cholesterol  |         |                         |         |                   |
|                                 | No (n=84,337)                |         | Yes (n=11,517)          |         | P for interaction |
|                                 | HR (95% CI)                  | P value | HR (95% CI)             | P value |                   |
| <b>Cases/person-years</b>       | 2,226/981,121                |         | 826/129,519             |         |                   |
| <b>Plasma SFAs</b>              | 1.04 (1.03-1.06)             | <0.001  | 1.02 (0.99-1.05)        | 0.235   | 0.100             |
| <b>Plasma MUFAs</b>             | 1.06 (1.04-1.08)             | <0.001  | 1.02 (0.98-1.05)        | 0.340   | 0.021             |
| <b>Plasma PUFAs</b>             | 0.59 (0.53-0.66)             | <0.001  | 0.70 (0.58-0.84)        | <0.001  | <0.001            |
| <b>Plasma n-6 PUFAs</b>         | 0.64 (0.58-0.70)             | <0.001  | 0.74 (0.63-0.88)        | <0.001  | <0.001            |
| <b>Plasma LA</b>                | 0.64 (0.58-0.70)             | <0.001  | 0.73 (0.63-0.85)        | <0.001  | 0.010             |
| <b>Plasma non-LA n-6 PUFAs</b>  | 0.84 (0.78-0.91)             | <0.001  | 1.00 (0.93-1.07)        | 0.946   | 0.016             |
| <b>Plasma n-3 PUFAs</b>         | 0.90 (0.84-0.96)             | 0.001   | 0.92 (0.83-1.01)        | 0.087   | 0.295             |
| <b>Plasma DHA</b>               | 0.96 (0.88-1.04)             | 0.304   | 0.87 (0.77-0.99)        | 0.038   | 0.255             |
| <b>Plasma non-DHA n-3 PUFAs</b> | 0.87 (0.80-0.93)             | <0.001  | 1.01 (0.90-1.12)        | 0.893   | 0.578             |
| <b>Plasma n-6/n-3 ratio</b>     | 1.00 (0.97-1.04)             | 0.885   | 1.08 (0.98-1.20)        | 0.129   | 0.189             |
|                                 | Family history of diabetes   |         |                         |         |                   |



|                                | No (n=75,502)    |         | Yes (n=20,352)   |         | P for interaction |
|--------------------------------|------------------|---------|------------------|---------|-------------------|
|                                | HR (95% CI)      | P value | HR (95% CI)      | P value |                   |
| Cases/person-years             | 1,942/876,901    |         | 1,110/233,739    |         |                   |
| Plasma SFAs                    | 1.02 (1.01-1.04) | 0.009   | 1.06 (1.03-1.08) | <0.001  | 0.023             |
| Plasma MUFAs                   | 1.03 (1.01-1.04) | 0.004   | 1.07 (1.03-1.11) | <0.001  | 0.060             |
| Plasma PUFAs                   | 0.60 (0.53-0.68) | <0.001  | 0.65 (0.56-0.77) | <0.001  | 0.546             |
| Plasma n-6 PUFAs               | 0.65 (0.58-0.72) | <0.001  | 0.71 (0.61-0.82) | <0.001  | 0.474             |
| Plasma LA                      | 0.63 (0.57-0.69) | <0.001  | 0.75 (0.65-0.86) | <0.001  | 0.085             |
| Plasma non-LA n-6 PUFAs        | 0.92 (0.85-0.99) | 0.024   | 0.85 (0.77-0.94) | 0.001   | 0.060             |
| Plasma n-3 PUFAs               | 0.90 (0.84-0.96) | 0.001   | 0.91 (0.83-1.00) | 0.049   | 0.826             |
| Plasma DHA                     | 0.94 (0.86-1.02) | 0.122   | 0.92 (0.81-1.03) | 0.145   | 0.773             |
| Plasma non-DHA n-3 PUFAs       | 0.90 (0.83-0.97) | 0.006   | 0.92 (0.83-1.02) | 0.111   | 0.855             |
| Plasma n-6/n-3 ratio           | 1.02 (0.98-1.07) | 0.367   | 1.00 (0.95-1.04) | 0.812   | 0.693             |
| <b>Vitamin supplementation</b> |                  |         |                  |         |                   |
|                                | No (n=65,434)    |         | Yes (n=30,420)   |         | P for interaction |
|                                | HR (95% CI)      | P value | HR (95% CI)      | P value |                   |
| Cases/person-years             | 2,135/758,253    |         | 917/352,388      |         |                   |
| Plasma SFAs                    | 1.04 (1.02-1.06) | <0.001  | 1.02 (1.00-1.05) | 0.093   | 0.304             |
| Plasma MUFAs                   | 1.06 (1.03-1.08) | <0.001  | 1.02 (0.99-1.05) | 0.170   | 0.053             |
| Plasma PUFAs                   | 0.61 (0.55-0.69) | <0.001  | 0.62 (0.52-0.74) | <0.001  | 0.652             |
| Plasma n-6 PUFAs               | 0.67 (0.60-0.74) | <0.001  | 0.66 (0.57-0.77) | <0.001  | 0.320             |
| Plasma LA                      | 0.67 (0.60-0.74) | <0.001  | 0.67 (0.58-0.77) | <0.001  | 0.403             |
| Plasma non-LA n-6 PUFAs        | 0.89 (0.83-0.95) | 0.001   | 0.90 (0.81-1.01) | 0.067   | 0.755             |
| Plasma n-3 PUFAs               | 0.87 (0.82-0.93) | <.0001  | 0.95 (0.87-1.03) | 0.223   | 0.109             |
| Plasma DHA                     | 0.89 (0.81-0.97) | 0.007   | 0.99 (0.90-1.10) | 0.895   | 0.281             |
| Plasma non-DHA n-3 PUFAs       | 0.90 (0.83-0.97) | 0.005   | 0.90 (0.81-1.01) | 0.066   | 0.154             |
| Plasma n-6/n-3 ratio           | 1.03 (0.99-1.07) | 0.202   | 0.99 (0.93-1.05) | 0.717   | 0.253             |
| <b>Mineral supplementation</b> |                  |         |                  |         |                   |
|                                | No (n=84,084)    |         | Yes (n=11,770)   |         | P for interaction |
|                                | HR (95% CI)      | P value | HR (95% CI)      | P value |                   |
| Cases/person-years             | 2,704/974,332    |         | 348/136,309      |         |                   |
| Plasma SFAs                    | 1.03 (1.02-1.05) | <0.001  | 1.03 (1.00-1.07) | 0.074   | 0.894             |
| Plasma MUFAs                   | 1.03 (1.02-1.05) | <0.001  | 1.04 (0.99-1.09) | 0.115   | 0.389             |
| Plasma PUFAs                   | 0.61 (0.56-0.68) | <0.001  | 0.64 (0.47-0.88) | 0.006   | 0.037             |
| Plasma n-6 PUFAs               | 0.66 (0.61-0.73) | <0.001  | 0.66 (0.50-0.88) | 0.004   | 0.078             |
| Plasma LA                      | 0.66 (0.61-0.72) | <0.001  | 0.68 (0.53-0.87) | 0.002   | 0.027             |
| Plasma non-LA n-6 PUFAs        | 0.89 (0.84-0.95) | <0.001  | 0.89 (0.74-1.07) | 0.197   | 0.818             |
| Plasma n-3 PUFAs               | 0.89 (0.84-0.94) | <0.001  | 1.02 (0.88-1.19) | 0.790   | 0.205             |
| Plasma DHA                     | 0.91 (0.85-0.98) | 0.017   | 1.03 (0.85-1.25) | 0.789   | 0.112             |
| Plasma non-DHA n-3 PUFAs       | 0.90 (0.84-0.96) | 0.002   | 0.93 (0.78-1.11) | 0.422   | 0.615             |
| Plasma n-6/n-3 ratio           | 1.01 (0.98-1.04) | 0.533   | 0.99 (0.89-1.11) | 0.901   | 0.907             |
| <b>Aspirin use</b>             |                  |         |                  |         |                   |
|                                | No (n=87,610)    |         | Yes (n=8,244)    |         | P for interaction |
|                                | HR (95% CI)      | P value | HR (95% CI)      | P value |                   |

|                                 | HR (95% CI)             | P value | HR (95% CI)             | P value |                   |
|---------------------------------|-------------------------|---------|-------------------------|---------|-------------------|
| <b>Cases/person-years</b>       | 2,570/1,016,538         |         | 482/94,103              |         |                   |
| <b>Plasma SFAs</b>              | 1.04 (1.02-1.05)        | <0.001  | 1.01 (0.98-1.04)        | 0.507   | 0.173             |
| <b>Plasma MUFAs</b>             | 1.06 (1.04-1.08)        | <0.001  | 1.00 (0.96-1.05)        | 0.901   | 0.070             |
| <b>Plasma PUFAs</b>             | 0.60 (0.54-0.66)        | <0.001  | 0.72 (0.56-0.93)        | 0.011   | <0.001            |
| <b>Plasma n-6 PUFAs</b>         | 0.64 (0.59-0.71)        | <0.001  | 0.76 (0.60-0.96)        | 0.019   | <0.001            |
| <b>Plasma LA</b>                | 0.65 (0.59-0.71)        | <0.001  | 0.76 (0.61-0.93)        | 0.009   | 0.006             |
| <b>Plasma non-LA n-6 PUFAs</b>  | 0.87 (0.81-0.93)        | <0.001  | 0.98 (0.90-1.07)        | 0.655   | 0.034             |
| <b>Plasma n-3 PUFAs</b>         | 0.89 (0.84-0.95)        | <0.001  | 0.93 (0.83-1.05)        | 0.250   | 0.598             |
| <b>Plasma DHA</b>               | 0.93 (0.86-1.00)        | 0.056   | 0.93 (0.80-1.07)        | 0.302   | 0.128             |
| <b>Plasma non-DHA n-3 PUFAs</b> | 0.90 (0.84-0.97)        | 0.004   | 0.91 (0.79-1.05)        | 0.205   | 0.725             |
| <b>Plasma n-6/n-3 ratio</b>     | 1.01 (0.97-1.04)        | 0.732   | 1.04 (0.94-1.15)        | 0.423   | 0.366             |
| <b>Healthy diet score</b>       |                         |         |                         |         |                   |
|                                 | Below median (n=47,878) |         | Above median (n=47,867) |         | P for interaction |
|                                 | HR (95% CI)             | P value | HR (95% CI)             | P value |                   |
| <b>Cases/person-years</b>       | 1,796/552,088           |         | 1,248/557,379           |         |                   |
| <b>Plasma SFAs</b>              | 1.04 (1.02-1.06)        | <0.001  | 1.03 (1.00-1.05)        | 0.019   | 0.280             |
| <b>Plasma MUFAs</b>             | 1.07 (1.05-1.10)        | <0.001  | 1.02 (0.99-1.04)        | 0.241   | 0.006             |
| <b>Plasma PUFAs</b>             | 0.63 (0.56-0.71)        | <0.001  | 0.59 (0.51-0.69)        | <0.001  | 0.196             |
| <b>Plasma n-6 PUFAs</b>         | 0.68 (0.61-0.76)        | <0.001  | 0.64 (0.56-0.74)        | <0.001  | 0.101             |
| <b>Plasma LA</b>                | 0.65 (0.59-0.73)        | <0.001  | 0.68 (0.60-0.77)        | <0.001  | 0.070             |
| <b>Plasma non-LA n-6 PUFAs</b>  | 0.91 (0.84-0.98)        | 0.015   | 0.86 (0.78-0.94)        | 0.002   | 0.736             |
| <b>Plasma n-3 PUFAs</b>         | 0.88 (0.82-0.95)        | <0.001  | 0.93 (0.86-1.00)        | 0.060   | 0.160             |
| <b>Plasma DHA</b>               | 0.94 (0.86-1.04)        | 0.218   | 0.92 (0.83-1.02)        | 0.095   | 0.774             |
| <b>Plasma non-DHA n-3 PUFAs</b> | 0.86 (0.79-0.94)        | <0.001  | 0.95 (0.87-1.04)        | 0.258   | 0.177             |
| <b>Plasma n-6/n-3 ratio</b>     | 1.01 (0.96-1.06)        | 0.711   | 1.01 (0.97-1.06)        | 0.648   | 0.580             |
| <b>Healthy lifestyle score</b>  |                         |         |                         |         |                   |
|                                 | Below median (n=45,766) |         | Above median (n=50,088) |         | P for interaction |
|                                 | HR (95% CI)             | P value | HR (95% CI)             | P value |                   |
| <b>Cases/person-years</b>       | 2,185/524,452           |         | 867/586,189             |         |                   |
| <b>Plasma SFAs</b>              | 1.03 (1.02-1.05)        | <0.001  | 1.03 (1.00-1.06)        | 0.039   | 0.690             |
| <b>Plasma MUFAs</b>             | 1.03 (1.02-1.05)        | <0.001  | 1.04 (1.00-1.08)        | 0.032   | 0.579             |
| <b>Plasma PUFAs</b>             | 0.65 (0.59-0.73)        | <0.001  | 0.51 (0.42-0.62)        | <0.001  | 0.107             |
| <b>Plasma n-6 PUFAs</b>         | 0.70 (0.64-0.78)        | <0.001  | 0.56 (0.47-0.67)        | <0.001  | 0.057             |
| <b>Plasma LA</b>                | 0.67 (0.61-0.74)        | <0.001  | 0.65 (0.55-0.76)        | <0.001  | 0.320             |
| <b>Plasma non-LA n-6 PUFAs</b>  | 0.92 (0.86-0.99)        | 0.024   | 0.83 (0.74-0.93)        | 0.001   | 0.141             |
| <b>Plasma n-3 PUFAs</b>         | 0.91 (0.85-0.97)        | 0.004   | 0.89 (0.80-0.98)        | 0.016   | 0.198             |
| <b>Plasma DHA</b>               | 0.95 (0.87-1.03)        | 0.176   | 0.91 (0.80-1.03)        | 0.134   | 0.810             |
| <b>Plasma non-DHA n-3 PUFAs</b> | 0.86 (0.80-0.93)        | <0.001  | 1.01 (0.91-1.13)        | 0.818   | 0.140             |
| <b>Plasma n-6/n-3 ratio</b>     | 1.00 (0.97-1.04)        | 0.958   | 1.03 (0.97-1.10)        | 0.338   | 0.776             |

MUFA, monounsaturated fatty acid; PUFA, polyunsaturated fatty acid; SFA, saturated fatty acid; T2D, type 2 diabetes.

Hazard ratio for 1 SD increment in plasma fatty acids were estimated by Cox proportional hazards models adjusted for age, sex, race, centers, BMI, education, Townsend deprivation index, household income,

smoking, alcohol consumption, physical activity, history of hypertension, history of high cholesterol, family history of diabetes, vitamin supplement use, mineral supplement use, aspirin use, and remaining plasma fatty acids (SFAs, MUFAs, PUFAs, n-6 PUFAs, LA, non-LA n-6 PUFAs, n-3 PUFAs, DHA, and non-DHA n-3 PUFAs).

**Supplementary Table 13.** Multivariable hazard ratio (95% CIs) of T2D from sensitivity analyses

|                                                        | Quartiles of plasma fatty acids (% of total fatty acids) |                  |                  |                  | P trend |
|--------------------------------------------------------|----------------------------------------------------------|------------------|------------------|------------------|---------|
|                                                        | Q1                                                       | Q2               | Q3               | Q4               |         |
| <b>Further adjusted for lipid-lowering medications</b> |                                                          |                  |                  |                  |         |
| Plasma SFAs                                            | 1.00                                                     | 1.20 (1.05-1.38) | 1.22 (1.05-1.41) | 1.72 (1.47-2.03) | <0.001  |
| Plasma MUFAs                                           | 1.00                                                     | 1.16 (0.97-1.39) | 1.33 (1.09-1.64) | 1.88 (1.49-2.37) | <0.001  |
| Plasma PUFAs                                           | 1.00                                                     | 0.86 (0.75-0.98) | 0.79 (0.65-0.96) | 0.68 (0.51-0.89) | 0.005   |
| Plasma n-6 PUFAs                                       | 1.00                                                     | 0.81 (0.72-0.92) | 0.76 (0.64-0.90) | 0.72 (0.57-0.90) | <0.001  |
| Plasma LA                                              | 1.00                                                     | 0.81 (0.72-0.90) | 0.67 (0.57-0.77) | 0.57 (0.46-0.69) | <0.001  |
| Plasma non-LA n-6 PUFAs                                | 1.00                                                     | 0.87 (0.79-0.96) | 0.86 (0.76-0.96) | 0.73 (0.63-0.85) | <0.001  |
| Plasma n-3 PUFAs                                       | 1.00                                                     | 0.94 (0.86-1.04) | 0.77 (0.69-0.86) | 0.82 (0.72-0.93) | <0.001  |
| Plasma DHA                                             | 1.00                                                     | 0.92 (0.83-1.02) | 0.85 (0.75-0.98) | 0.95 (0.79-1.14) | 0.297   |
| Plasma non-DHA n-3 PUFAs                               | 1.00                                                     | 0.87 (0.78-0.97) | 0.82 (0.73-0.92) | 0.74 (0.64-0.87) | <0.001  |
| Plasma n-6/n-3 ratio                                   | 1.00                                                     | 0.98 (0.88-1.08) | 1.06 (0.96-1.18) | 1.10 (0.99-1.22) | 0.037   |
| <b>Further adjusted for glucosamine</b>                |                                                          |                  |                  |                  |         |
| Plasma SFAs                                            | 1.00                                                     | 1.20 (1.05-1.38) | 1.21 (1.04-1.41) | 1.72 (1.46-2.02) | <0.001  |
| Plasma MUFAs                                           | 1.00                                                     | 1.16 (0.97-1.39) | 1.33 (1.09-1.64) | 1.87 (1.48-2.37) | <0.001  |
| Plasma PUFAs                                           | 1.00                                                     | 0.86 (0.75-0.98) | 0.79 (0.65-0.96) | 0.67 (0.51-0.89) | 0.005   |
| Plasma n-6 PUFAs                                       | 1.00                                                     | 0.81 (0.72-0.92) | 0.76 (0.64-0.90) | 0.72 (0.57-0.90) | <0.001  |
| Plasma LA                                              | 1.00                                                     | 0.80 (0.72-0.89) | 0.66 (0.57-0.77) | 0.56 (0.46-0.69) | <0.001  |
| Plasma non-LA n-6 PUFAs                                | 1.00                                                     | 0.87 (0.79-0.96) | 0.87 (0.77-0.97) | 0.75 (0.64-0.87) | <0.001  |
| Plasma n-3 PUFAs                                       | 1.00                                                     | 0.94 (0.86-1.04) | 0.77 (0.69-0.86) | 0.82 (0.72-0.93) | <0.001  |
| Plasma DHA                                             | 1.00                                                     | 0.92 (0.83-1.02) | 0.85 (0.75-0.98) | 0.95 (0.79-1.13) | 0.277   |
| Plasma non-DHA n-3 PUFAs                               | 1.00                                                     | 0.87 (0.78-0.97) | 0.82 (0.73-0.92) | 0.74 (0.64-0.86) | <0.001  |
| Plasma n-6/n-3 ratio                                   | 1.00                                                     | 0.98 (0.88-1.08) | 1.06 (0.96-1.18) | 1.10 (0.98-1.22) | 0.038   |
| <b>Further adjusted for hormone and contraceptive</b>  |                                                          |                  |                  |                  |         |
| Plasma SFAs                                            | 1.00                                                     | 1.20 (1.05-1.38) | 1.22 (1.05-1.41) | 1.72 (1.47-2.03) | <0.001  |
| Plasma MUFAs                                           | 1.00                                                     | 1.16 (0.97-1.38) | 1.33 (1.08-1.63) | 1.87 (1.48-2.36) | <0.001  |
| Plasma PUFAs                                           | 1.00                                                     | 0.86 (0.75-0.98) | 0.79 (0.65-0.96) | 0.67 (0.51-0.89) | 0.005   |
| Plasma n-6 PUFAs                                       | 1.00                                                     | 0.81 (0.72-0.92) | 0.76 (0.64-0.90) | 0.72 (0.57-0.90) | <0.001  |
| Plasma LA                                              | 1.00                                                     | 0.80 (0.72-0.89) | 0.66 (0.57-0.77) | 0.56 (0.46-0.69) | <0.001  |
| Plasma non-LA n-6 PUFAs                                | 1.00                                                     | 0.87 (0.79-0.96) | 0.87 (0.77-0.97) | 0.75 (0.64-0.87) | <0.001  |
| Plasma n-3 PUFAs                                       | 1.00                                                     | 0.94 (0.86-1.04) | 0.78 (0.70-0.86) | 0.82 (0.72-0.94) | <0.001  |
| Plasma DHA                                             | 1.00                                                     | 0.92 (0.83-1.02) | 0.86 (0.75-0.98) | 0.95 (0.79-1.14) | 0.303   |
| Plasma non-DHA n-3 PUFAs                               | 1.00                                                     | 0.87 (0.78-0.97) | 0.82 (0.73-0.92) | 0.75 (0.64-0.87) | <0.001  |
| Plasma n-6/n-3 ratio                                   | 1.00                                                     | 0.97 (0.88-1.08) | 1.06 (0.96-1.17) | 1.09 (0.98-1.22) | 0.047   |
| <b>Further adjusted for a sleep pattern</b>            |                                                          |                  |                  |                  |         |
| Plasma SFAs                                            | 1.00                                                     | 1.21 (1.05-1.38) | 1.22 (1.05-1.42) | 1.73 (1.47-2.03) | <0.001  |
| Plasma MUFAs                                           | 1.00                                                     | 1.17 (0.98-1.40) | 1.35 (1.10-1.66) | 1.90 (1.51-2.41) | <0.001  |
| Plasma PUFAs                                           | 1.00                                                     | 0.87 (0.76-0.99) | 0.80 (0.66-0.98) | 0.69 (0.52-0.91) | 0.009   |
| Plasma n-6 PUFAs                                       | 1.00                                                     | 0.82 (0.73-0.92) | 0.76 (0.64-0.90) | 0.73 (0.58-0.91) | <0.001  |
| Plasma LA                                              | 1.00                                                     | 0.79 (0.71-0.88) | 0.66 (0.57-0.77) | 0.57 (0.46-0.70) | <0.001  |
| Plasma non-LA n-6 PUFAs                                | 1.00                                                     | 0.87 (0.79-0.96) | 0.87 (0.78-0.97) | 0.75 (0.65-0.87) | <0.001  |
| Plasma n-3 PUFAs                                       | 1.00                                                     | 0.94 (0.85-1.03) | 0.77 (0.69-0.86) | 0.82 (0.72-0.93) | <0.001  |
| Plasma DHA                                             | 1.00                                                     | 0.93 (0.84-1.03) | 0.86 (0.75-0.99) | 0.96 (0.80-1.15) | 0.344   |
| Plasma non-DHA n-3 PUFAs                               | 1.00                                                     | 0.87 (0.78-0.97) | 0.82 (0.73-0.92) | 0.74 (0.64-0.86) | <0.001  |

|                                                                         |              |                  |                  |                  |        |
|-------------------------------------------------------------------------|--------------|------------------|------------------|------------------|--------|
| Plasma n-6/n-3 ratio                                                    | 1.00         | 0.97 (0.88-1.08) | 1.06 (0.96-1.17) | 1.09 (0.98-1.22) | 0.045  |
| <b>Further adjusted for healthy diet score</b>                          |              |                  |                  |                  |        |
| Plasma SFAs                                                             | 1.00         | 1.20 (1.05-1.38) | 1.21 (1.04-1.41) | 1.72 (1.46-2.02) | <0.001 |
| Plasma MUFAs                                                            | 1.00         | 1.17 (0.98-1.40) | 1.35 (1.10-1.66) | 1.90 (1.50-2.40) | <0.001 |
| Plasma PUFAs                                                            | 1.00         | 0.87 (0.76-0.99) | 0.80 (0.66-0.98) | 0.69 (0.52-0.92) | 0.009  |
| Plasma n-6 PUFAs                                                        | 1.00         | 0.82 (0.72-0.92) | 0.76 (0.64-0.90) | 0.72 (0.57-0.91) | <0.001 |
| Plasma LA                                                               | 1.00         | 0.80 (0.72-0.89) | 0.67 (0.57-0.77) | 0.57 (0.46-0.70) | <0.001 |
| Plasma non-LA n-6 PUFAs                                                 | 1.00         | 0.87 (0.79-0.96) | 0.86 (0.77-0.97) | 0.74 (0.64-0.86) | <0.001 |
| Plasma n-3 PUFAs                                                        | 1.00         | 0.95 (0.86-1.04) | 0.78 (0.70-0.87) | 0.84 (0.74-0.96) | <0.001 |
| Plasma DHA                                                              | 1.00         | 0.93 (0.84-1.03) | 0.87 (0.76-0.99) | 0.97 (0.81-1.16) | 0.418  |
| Plasma non-DHA n-3 PUFAs                                                | 1.00         | 0.87 (0.78-0.97) | 0.82 (0.73-0.93) | 0.75 (0.65-0.87) | <0.001 |
| Plasma n-6/n-3 ratio                                                    | 1.00         | 0.96 (0.87-1.07) | 1.04 (0.94-1.16) | 1.07 (0.96-1.20) | 0.096  |
| <b>Further adjusted for history of nonalcoholic fatty liver disease</b> |              |                  |                  |                  |        |
| Plasma SFAs                                                             | 1.00         | 1.20 (1.05-1.38) | 1.21 (1.04-1.41) | 1.72 (1.46-2.02) | <0.001 |
| Plasma MUFAs                                                            | 1.00         | 1.16 (0.97-1.39) | 1.33 (1.08-1.63) | 1.87 (1.48-2.37) | <0.001 |
| Plasma PUFAs                                                            | 1.00         | 0.86 (0.75-0.98) | 0.79 (0.65-0.96) | 0.67 (0.51-0.89) | 0.005  |
| Plasma n-6 PUFAs                                                        | 1.00         | 0.81 (0.72-0.92) | 0.76 (0.64-0.90) | 0.72 (0.57-0.90) | <0.001 |
| Plasma LA                                                               | 1.00         | 0.80 (0.72-0.89) | 0.66 (0.57-0.77) | 0.56 (0.46-0.69) | <0.001 |
| Plasma non-LA n-6 PUFAs                                                 | 1.00         | 0.87 (0.79-0.96) | 0.87 (0.77-0.97) | 0.75 (0.64-0.87) | <0.001 |
| Plasma n-3 PUFAs                                                        | 1.00         | 0.94 (0.86-1.04) | 0.77 (0.69-0.86) | 0.82 (0.72-0.93) | <0.001 |
| Plasma DHA                                                              | 1.00         | 0.92 (0.83-1.02) | 0.86 (0.75-0.98) | 0.95 (0.79-1.14) | 0.288  |
| Plasma non-DHA n-3 PUFAs                                                | 1.00         | 0.87 (0.78-0.97) | 0.82 (0.73-0.92) | 0.75 (0.64-0.87) | <0.001 |
| Plasma n-6/n-3 ratio                                                    | 1.00         | 0.98 (0.88-1.08) | 1.06 (0.96-1.18) | 1.09 (0.98-1.22) | 0.043  |
| <b>Excluding T2D cases occurred within the first 2 years</b>            |              |                  |                  |                  |        |
| Cases/n                                                                 | 453/23,937   | 545/23,938       | 642/23,924       | 1,243/23,886     |        |
| Plasma SFAs                                                             | 1.00         | 1.21 (1.05-1.39) | 1.21 (1.03-1.41) | 1.72 (1.45-2.03) | <0.001 |
| Cases/n                                                                 | 248/23,950   | 408/23,937       | 709/23,933       | 1,518/23,865     |        |
| Plasma MUFAs                                                            | 1.00         | 1.14 (0.95-1.37) | 1.33 (1.08-1.65) | 1.85 (1.46-2.35) | <0.001 |
| Cases/n                                                                 | 1,532/23,864 | 688/23,934       | 396/23,940       | 267/23,947       |        |
| Plasma PUFAs                                                            | 1.00         | 0.87 (0.76-0.99) | 0.78 (0.64-0.96) | 0.67 (0.50-0.89) | 0.007  |
| Cases/n                                                                 | 1,493/23,870 | 665/23,929       | 418/23,942       | 307/23,944       |        |
| Plasma n-6 PUFAs                                                        | 1.00         | 0.82 (0.72-0.93) | 0.76 (0.64-0.91) | 0.72 (0.57-0.91) | 0.001  |
| Cases/n                                                                 | 1,443/23,881 | 692/23,915       | 445/23,947       | 303/23,942       |        |
| Plasma LA                                                               | 1.00         | 0.79 (0.71-0.88) | 0.67 (0.58-0.78) | 0.56 (0.45-0.69) | <0.001 |
| Cases/n                                                                 | 969/23,902   | 710/23,920       | 639/23,930       | 565/23,933       |        |
| Plasma non-LA n-6 PUFAs                                                 | 1.00         | 0.87 (0.79-0.96) | 0.87 (0.77-0.97) | 0.74 (0.64-0.87) | <0.001 |
| Cases/n                                                                 | 882/23,906   | 812/23,910       | 624/23,933       | 565/23,936       |        |
| Plasma n-3 PUFAs                                                        | 1.00         | 0.94 (0.85-1.04) | 0.78 (0.70-0.88) | 0.83 (0.73-0.95) | <0.001 |
| Cases/n                                                                 | 1,287/23,874 | 706/23,929       | 479/23,938       | 411/23,944       |        |
| Plasma DHA                                                              | 1.00         | 0.93 (0.84-1.04) | 0.87 (0.75-0.99) | 0.97 (0.81-1.17) | 0.432  |
| Cases/n                                                                 | 659/23,918   | 750/23,921       | 777/23,919       | 697/23,927       |        |
| Plasma non-DHA n-3 PUFAs                                                | 1.00         | 0.88 (0.78-0.98) | 0.82 (0.73-0.93) | 0.74 (0.64-0.87) | <0.001 |
| Cases/n                                                                 | 737/23,924   | 711/23,927       | 730/23,919       | 705/23,915       |        |
| Plasma n-6/n-3 ratio                                                    | 1.00         | 0.98 (0.88-1.08) | 1.06 (0.95-1.17) | 1.08 (0.97-1.21) | 0.080  |

**Excluding participants with HbA1c levels  $\geq$  48 (mmol/mol) or glucose level  $\geq$  11.1 (mmol/L)**

|         |            |            |            |              |
|---------|------------|------------|------------|--------------|
| Cases/n | 444/23,892 | 516/23,877 | 603/23,829 | 1,118/23,643 |
|---------|------------|------------|------------|--------------|

|                          |              |                  |                  |                  |        |
|--------------------------|--------------|------------------|------------------|------------------|--------|
| Plasma SFAs              | 1.00         | 1.15 (1.00-1.33) | 1.13 (0.97-1.33) | 1.55 (1.30-1.83) | <0.001 |
| Cases/n                  | 245/23,920   | 393/23,893       | 663/23,836       | 1,380/23,592     |        |
| Plasma MUFAs             | 1.00         | 1.09 (0.91-1.32) | 1.24 (1.00-1.53) | 1.67 (1.31-2.14) | <0.001 |
| Cases/n                  | 1,391/23,585 | 641/23,840       | 389/23,902       | 260/23,914       |        |
| Plasma PUFAs             | 1.00         | 0.84 (0.73-0.96) | 0.76 (0.62-0.94) | 0.62 (0.46-0.83) | 0.002  |
| Cases/n                  | 1,364/23,614 | 610/23,826       | 403/23,883       | 304/23,918       |        |
| Plasma n-6 PUFAs         | 1.00         | 0.78 (0.69-0.89) | 0.74 (0.62-0.89) | 0.70 (0.55-0.89) | <0.001 |
| Cases/n                  | 1,317/23,628 | 656/23,838       | 415/23,866       | 293/23,909       |        |
| Plasma LA                | 1.00         | 0.79 (0.71-0.89) | 0.65 (0.56-0.77) | 0.55 (0.44-0.68) | <0.001 |
| Cases/n                  | 862/23,696   | 671/23,827       | 608/23,853       | 540/23,865       |        |
| Plasma non-LA n-6 PUFAs  | 1.00         | 0.91 (0.82-1.02) | 0.91 (0.81-1.03) | 0.78 (0.67-0.91) | 0.004  |
| Cases/n                  | 812/23,745   | 753/23,786       | 584/23,840       | 532/23,870       |        |
| Plasma n-3 PUFAs         | 1.00         | 0.93 (0.84-1.04) | 0.78 (0.69-0.87) | 0.81 (0.71-0.93) | <0.001 |
| Cases/n                  | 1,173/23,633 | 661/23,831       | 455/23,881       | 392/23,896       |        |
| Plasma DHA               | 1.00         | 0.91 (0.82-1.02) | 0.84 (0.72-0.96) | 0.90 (0.74-1.09) | 0.142  |
| Cases/n                  | 621/23,823   | 683/23,782       | 720/23,796       | 657/23,840       |        |
| Plasma non-DHA n-3 PUFAs | 1.00         | 0.86 (0.76-0.96) | 0.82 (0.73-0.94) | 0.76 (0.65-0.90) | 0.001  |
| Cases/n                  | 691/23,829   | 655/23,813       | 675/23,794       | 660/23,805       |        |
| Plasma n-6/n-3 ratio     | 1.00         | 0.96 (0.86-1.07) | 1.05 (0.94-1.17) | 1.08 (0.97-1.21) | 0.078  |

#### Excluding participants with extreme BMIs (<18.5 or >40)

|                          |              |                  |                  |                  |        |
|--------------------------|--------------|------------------|------------------|------------------|--------|
| Cases/n                  | 442/23,464   | 517/23,443       | 622/23,388       | 1,204/23,320     |        |
| Plasma SFAs              | 1.00         | 1.19 (1.04-1.38) | 1.23 (1.05-1.44) | 1.74 (1.47-2.07) | <0.001 |
| Cases/n                  | 244/23,534   | 397/23,548       | 687/23,429       | 1,457/23,104     |        |
| Plasma MUFAs             | 1.00         | 1.15 (0.96-1.38) | 1.38 (1.11-1.70) | 1.96 (1.53-2.49) | <0.001 |
| Cases/n                  | 1,474/23,164 | 662/23,399       | 386/23,520       | 263/23,532       |        |
| Plasma PUFAs             | 1.00         | 0.88 (0.76-1.00) | 0.81 (0.65-0.99) | 0.70 (0.52-0.93) | 0.016  |
| Cases/n                  | 1,438/23,262 | 646/23,404       | 403/23,462       | 298/23,487       |        |
| Plasma n-6 PUFAs         | 1.00         | 0.83 (0.73-0.94) | 0.78 (0.65-0.94) | 0.73 (0.57-0.92) | 0.002  |
| Cases/n                  | 1,378/23,223 | 677/23,367       | 428/23,506       | 302/23,519       |        |
| Plasma LA                | 1.00         | 0.80 (0.72-0.90) | 0.67 (0.57-0.78) | 0.56 (0.45-0.69) | <0.001 |
| Cases/n                  | 950/23,441   | 697/23,436       | 611/23,392       | 527/23,346       |        |
| Plasma non-LA n-6 PUFAs  | 1.00         | 0.88 (0.79-0.97) | 0.87 (0.77-0.97) | 0.74 (0.63-0.86) | <0.001 |
| Cases/n                  | 834/23,155   | 786/23,353       | 610/23,529       | 555/23,578       |        |
| Plasma n-3 PUFAs         | 1.00         | 0.94 (0.85-1.03) | 0.78 (0.69-0.87) | 0.81 (0.71-0.93) | <0.001 |
| Cases/n                  | 1,231/23,091 | 678/23,386       | 471/23,565       | 405/23,573       |        |
| Plasma DHA               | 1.00         | 0.91 (0.81-1.01) | 0.85 (0.74-0.98) | 0.94 (0.78-1.14) | 0.290  |
| Cases/n                  | 628/23,230   | 709/23,368       | 758/23,455       | 690/23,562       |        |
| Plasma non-DHA n-3 PUFAs | 1.00         | 0.86 (0.77-0.96) | 0.82 (0.72-0.92) | 0.74 (0.63-0.86) | <0.001 |
| Cases/n                  | 731/23,552   | 689/23,487       | 694/23,378       | 671/23,198       |        |
| Plasma n-6/n-3 ratio     | 1.00         | 0.97 (0.87-1.07) | 1.05 (0.94-1.17) | 1.10 (0.98-1.23) | 0.039  |

#### Excluding participants with missing covariate data

|              |              |                  |                  |                  |        |
|--------------|--------------|------------------|------------------|------------------|--------|
| Cases/n      | 309/17,193   | 364/16,988       | 431/17,037       | 853/17,250       |        |
| Plasma SFAs  | 1.00         | 1.21 (1.02-1.43) | 1.21 (1.00-1.45) | 1.69 (1.38-2.07) | <0.001 |
| Cases/n      | 162/17,351   | 282/17,166       | 470/16,950       | 1,043/17,001     |        |
| Plasma MUFAs | 1.00         | 1.19 (0.95-1.48) | 1.39 (1.08-1.80) | 1.97 (1.47-2.64) | <0.001 |
| Cases/n      | 1,055/17,114 | 439/16,898       | 292/17,136       | 171/17,320       |        |

|                          |              |                  |                  |                  |        |
|--------------------------|--------------|------------------|------------------|------------------|--------|
| Plasma PUFAs             | 1.00         | 0.83 (0.71-0.98) | 0.89 (0.70-1.14) | 0.70 (0.49-0.99) | 0.046  |
| Cases/ <i>n</i>          | 1,024/17,063 | 441/16,955       | 271/17,017       | 221/17,433       |        |
| Plasma n-6 PUFAs         | 1.00         | 0.80 (0.69-0.93) | 0.76 (0.61-0.94) | 0.80 (0.60-1.06) | 0.014  |
| Cases/ <i>n</i>          | 990/16,897   | 460/17,069       | 296/17,144       | 211/17,358       |        |
| Plasma LA                | 1.00         | 0.74 (0.65-0.85) | 0.64 (0.53-0.77) | 0.55 (0.43-0.72) | <0.001 |
| Cases/ <i>n</i>          | 654/17,150   | 491/17,263       | 431/17,068       | 381/16,987       |        |
| Plasma non-LA n-6 PUFAs  | 1.00         | 0.89 (0.78-1.00) | 0.89 (0.78-1.03) | 0.78 (0.65-0.94) | 0.010  |
| Cases/ <i>n</i>          | 620/17,190   | 553/17,126       | 418/17,300       | 366/16,852       |        |
| Plasma n-3 PUFAs         | 1.00         | 0.93 (0.82-1.04) | 0.74 (0.64-0.84) | 0.78 (0.66-0.92) | <0.001 |
| Cases/ <i>n</i>          | 883/16,959   | 475/17,166       | 335/17,246       | 264/17,097       |        |
| Plasma DHA               | 1.00         | 0.92 (0.81-1.04) | 0.89 (0.76-1.05) | 0.95 (0.76-1.19) | 0.475  |
| Cases/ <i>n</i>          | 473/17,315   | 508/17,185       | 517/17,113       | 459/16,855       |        |
| Plasma non-DHA n-3 PUFAs | 1.00         | 0.82 (0.72-0.94) | 0.75 (0.65-0.87) | 0.67 (0.56-0.81) | <0.001 |
| Cases/ <i>n</i>          | 489/16,903   | 471/17,137       | 499/17,191       | 498/17,237       |        |
| Plasma n-6/n-3 ratio     | 1.00         | 0.96 (0.85-1.10) | 1.10 (0.97-1.25) | 1.15 (1.01-1.32) | 0.010  |

MUFA, monounsaturated fatty acid; PUFA, polyunsaturated fatty acid; SFA, saturated fatty acid; T2D, type 2 diabetes.

Hazard ratio were estimated from Cox proportional hazards models adjusted for age, sex, race, centers, BMI, education, Townsend deprivation index, household income, smoking, alcohol consumption, physical activity, history of hypertension, history of high cholesterol, family history of diabetes, vitamin supplement use, mineral supplement use, aspirin use, and remaining plasma fatty acids (SFAs, MUFAs, PUFAs, n-6 PUFAs, LA, non-LA n-6 PUFAs, n-3 PUFAs, DHA, and non-DHA n-3 PUFAs).
